# Supplementary material for: Preparation of Chiral Enantioenriched Densely Substituted Cyclopropyl Azoles, Amines, and Ethers via Formal SN2′ Substitution of Bromocylopropanes
Source: MDPI journal article supplement (doi:10.3390/molecules27207069), 2022-10-20

## **Supplemental Information**

### **Preparation of Chiral Enantioenriched Densely Substituted Cyclopropyl Azoles, Amines, and Ethers via Formal SN2' Substitution of Bromocyclopropanes**

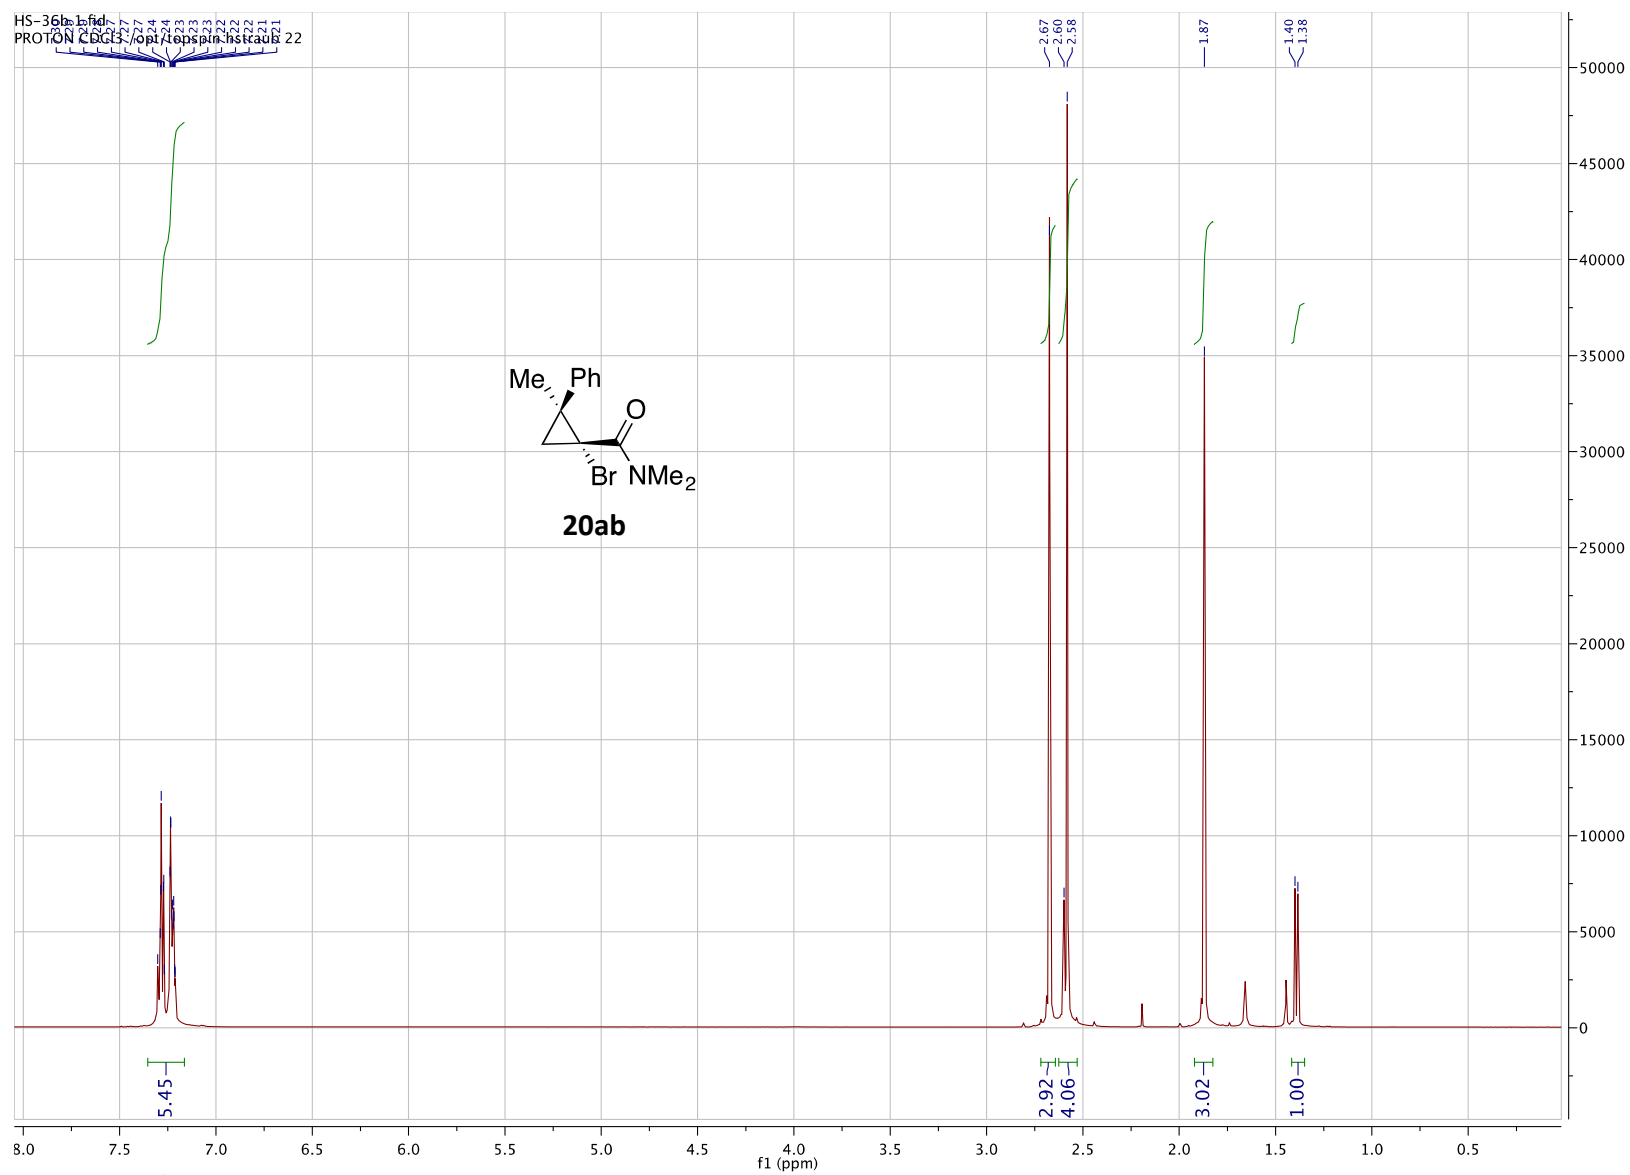

**Figure S1.**  $^1\text{H}$  NMR spectrum of compound **20ab**.

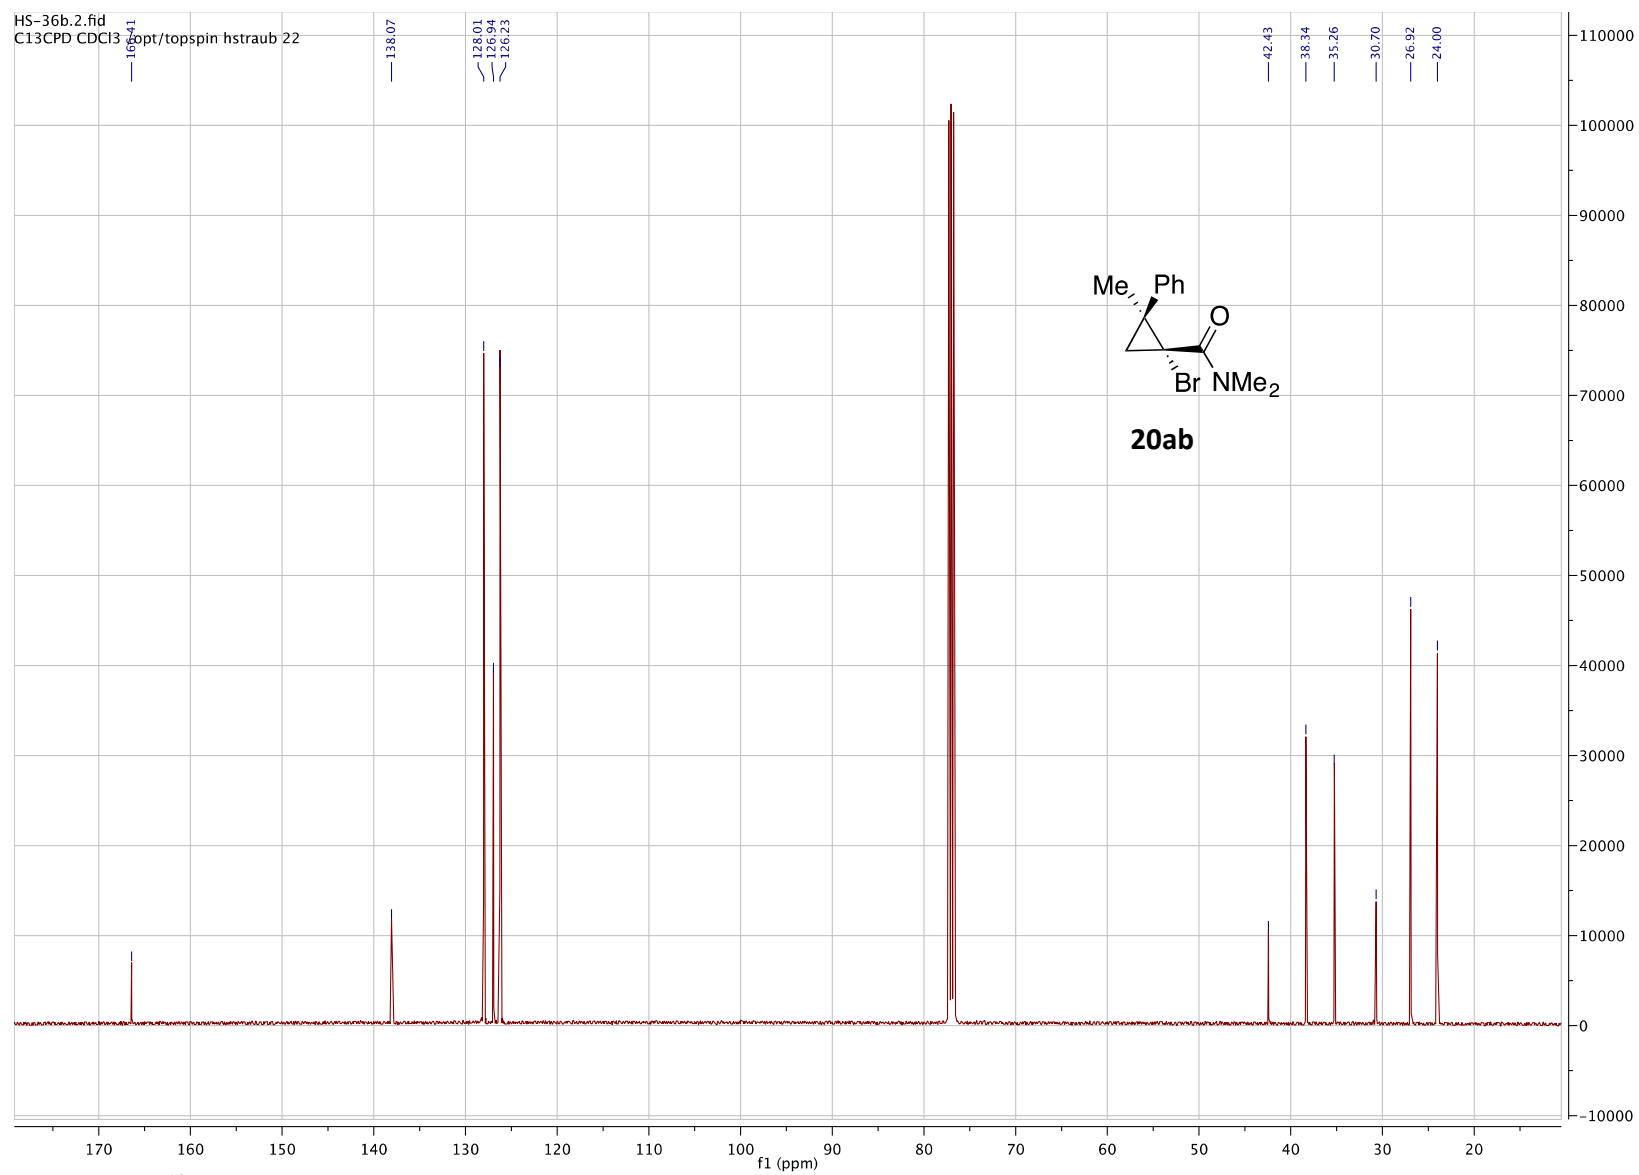

**Figure S2.**  $^{13}\text{C}$  NMR spectrum of compound **20ab**.

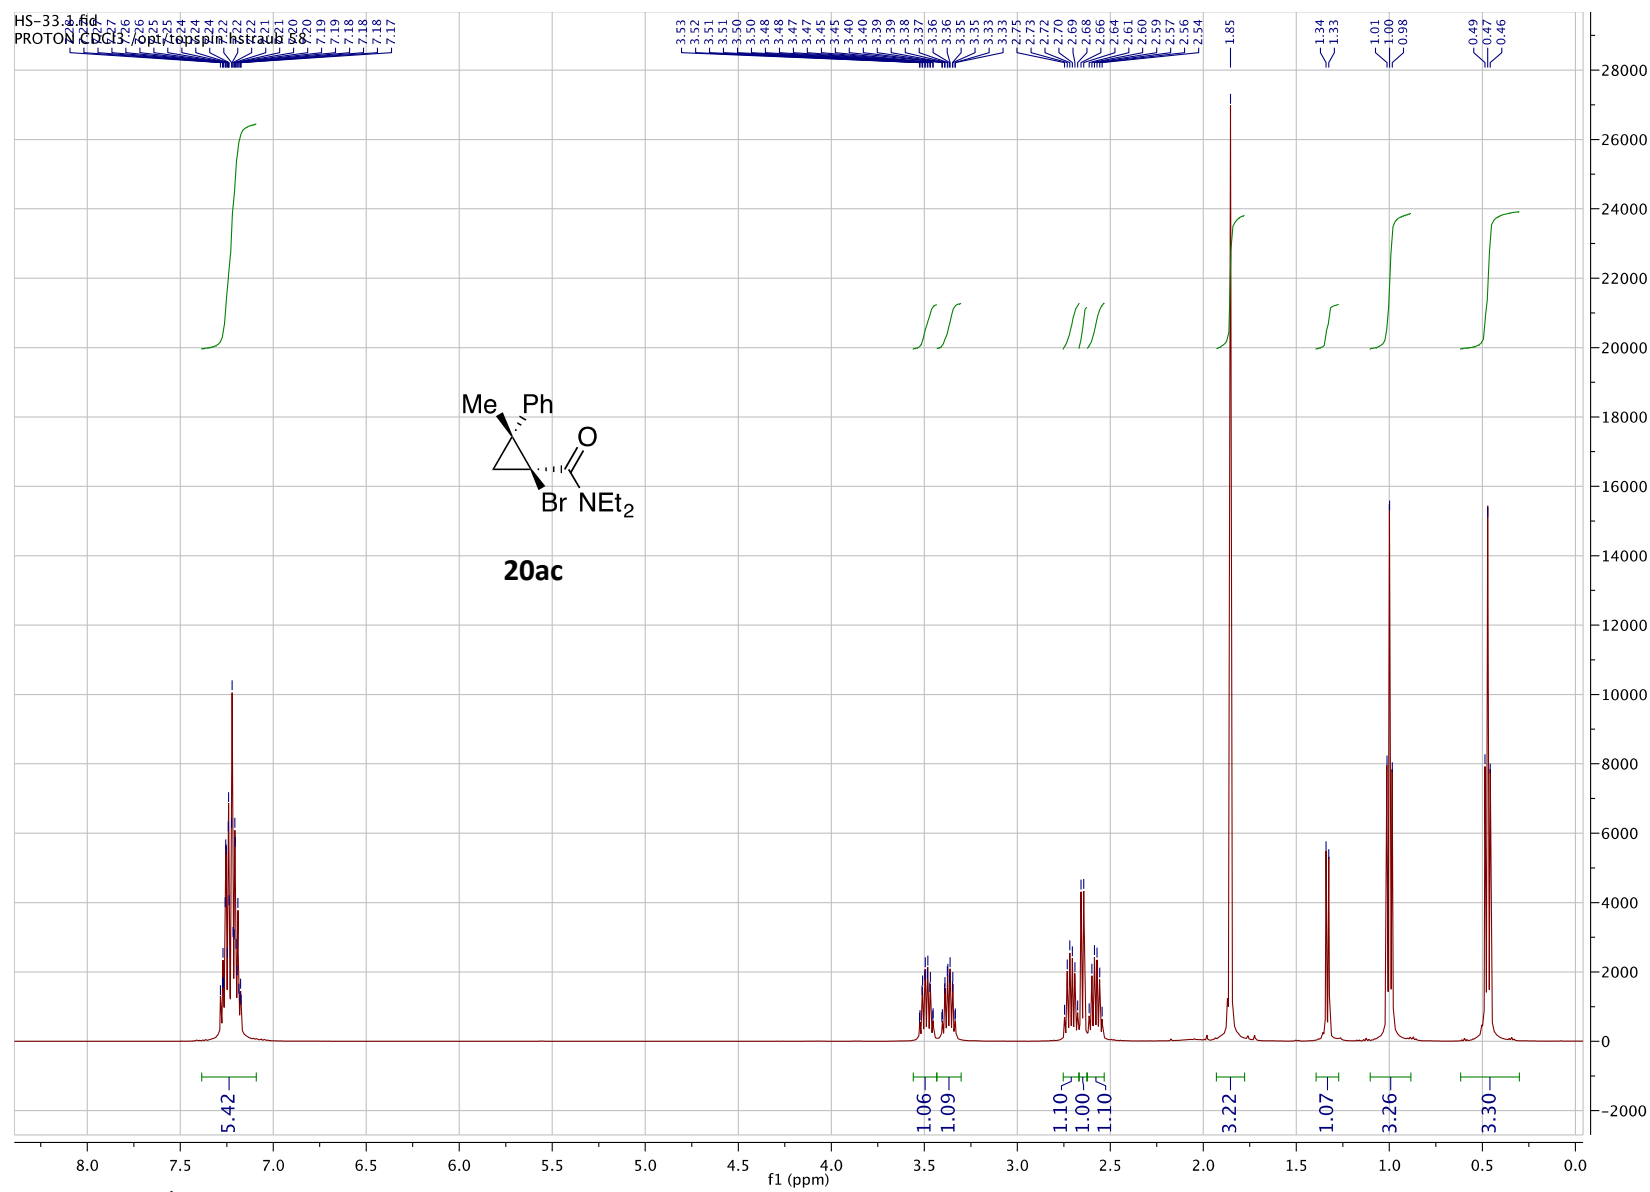

**Figure S3.** <sup>1</sup>H NMR spectrum of compound **20ac**

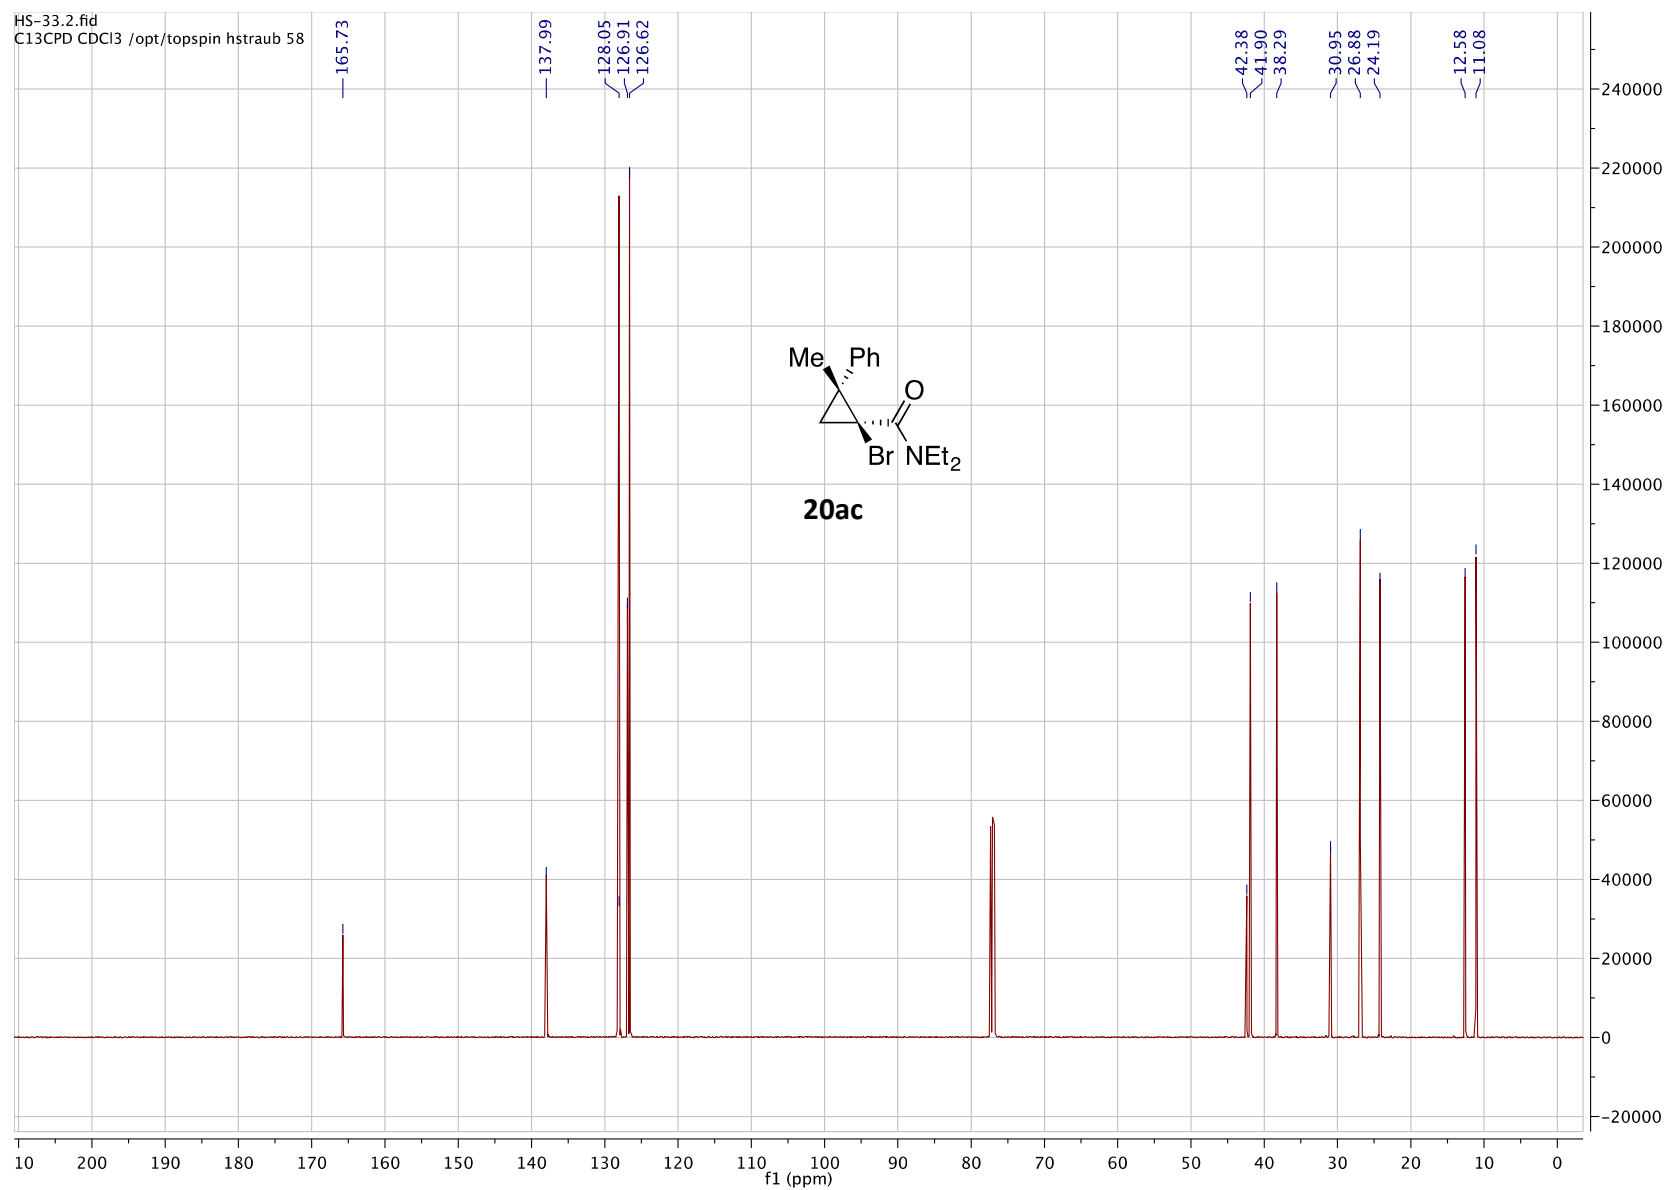

**Figure S4.**  $^{13}\text{C}$  NMR spectrum of compound **20ac**

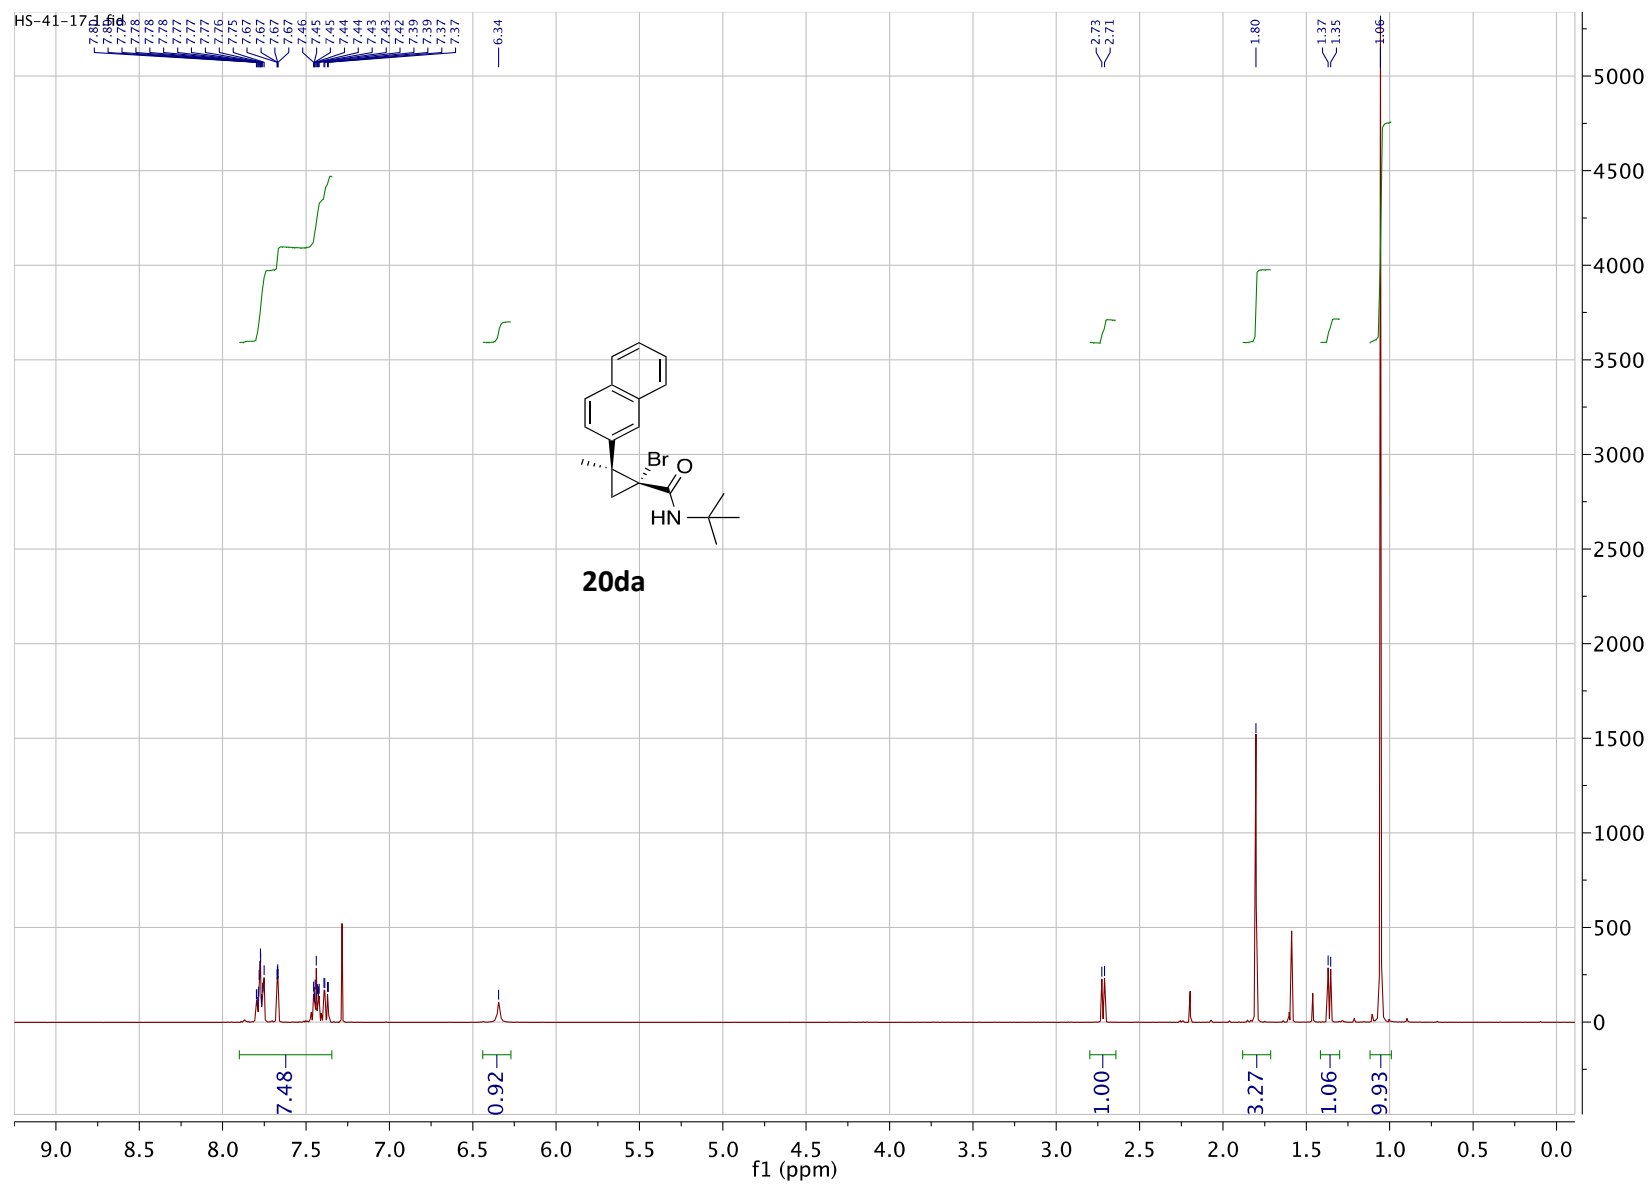

Figure S5.  $^1\text{H}$  NMR spectrum of compound 20da

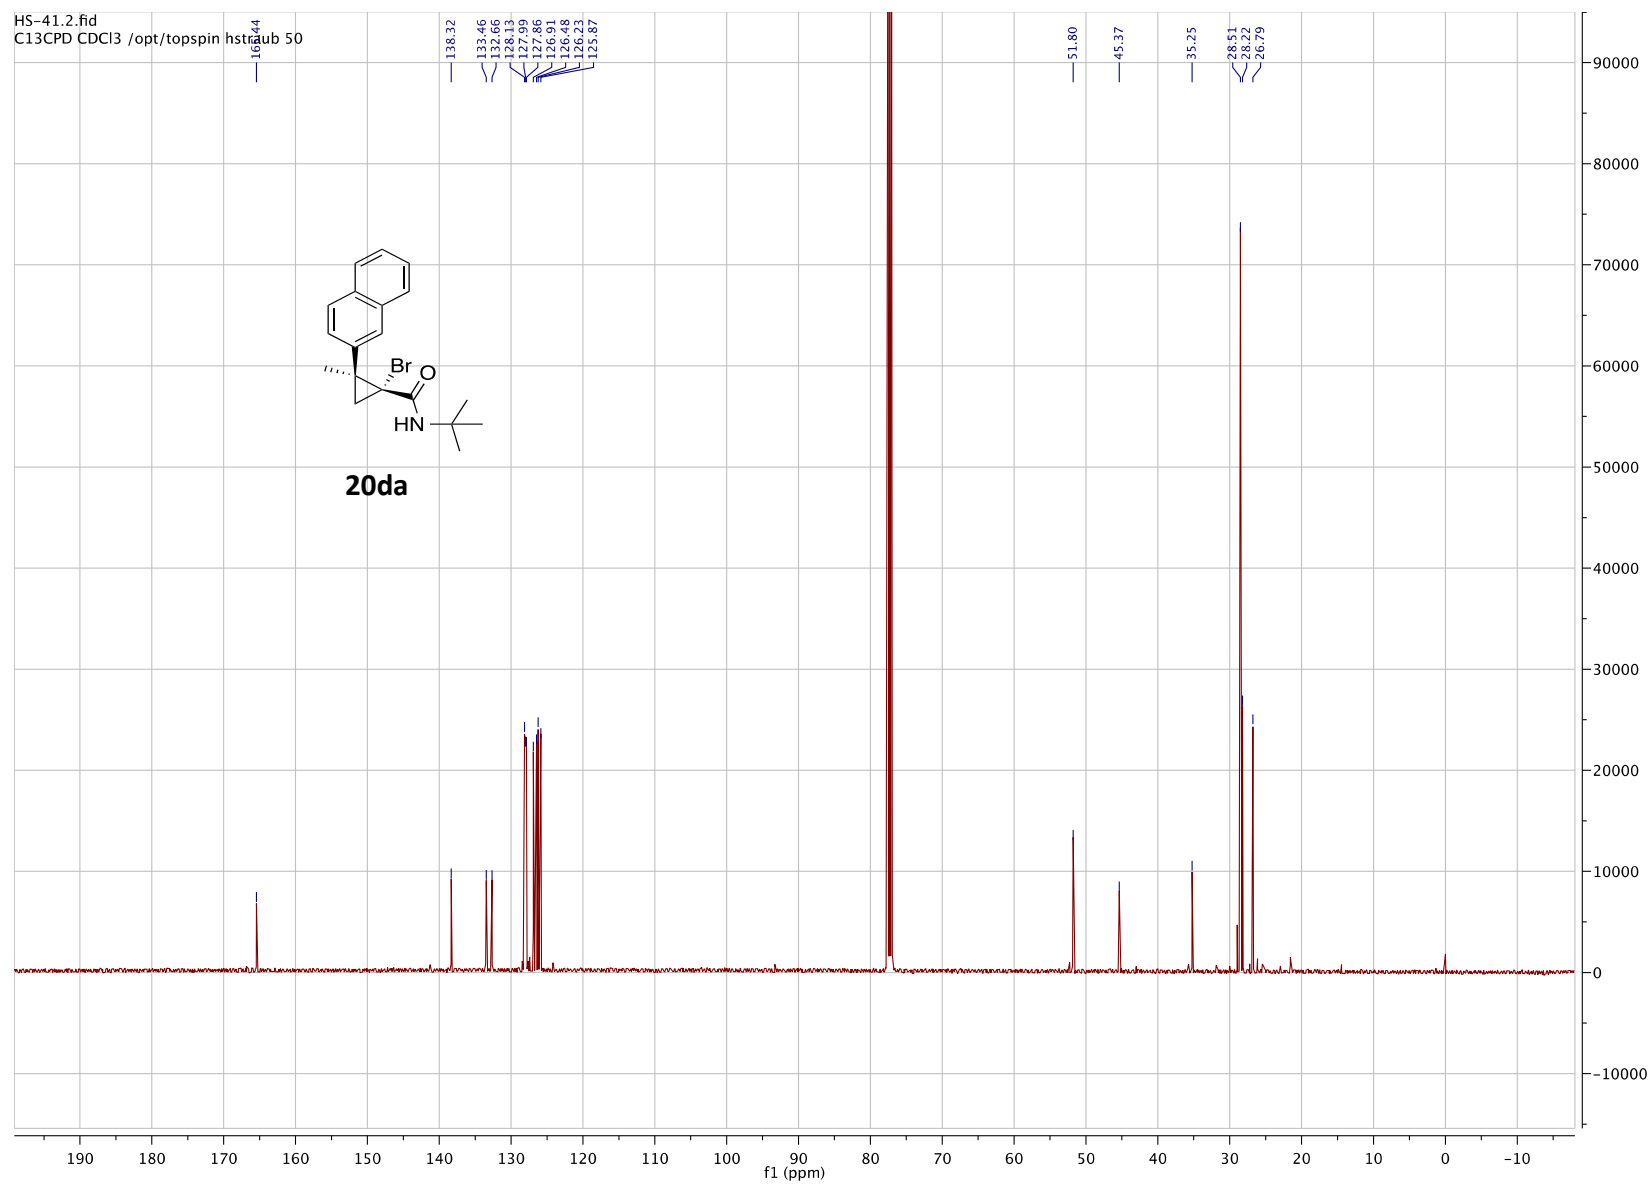

**Figure S6.**  $^{13}\text{C}$  NMR spectrum of compound **20da**

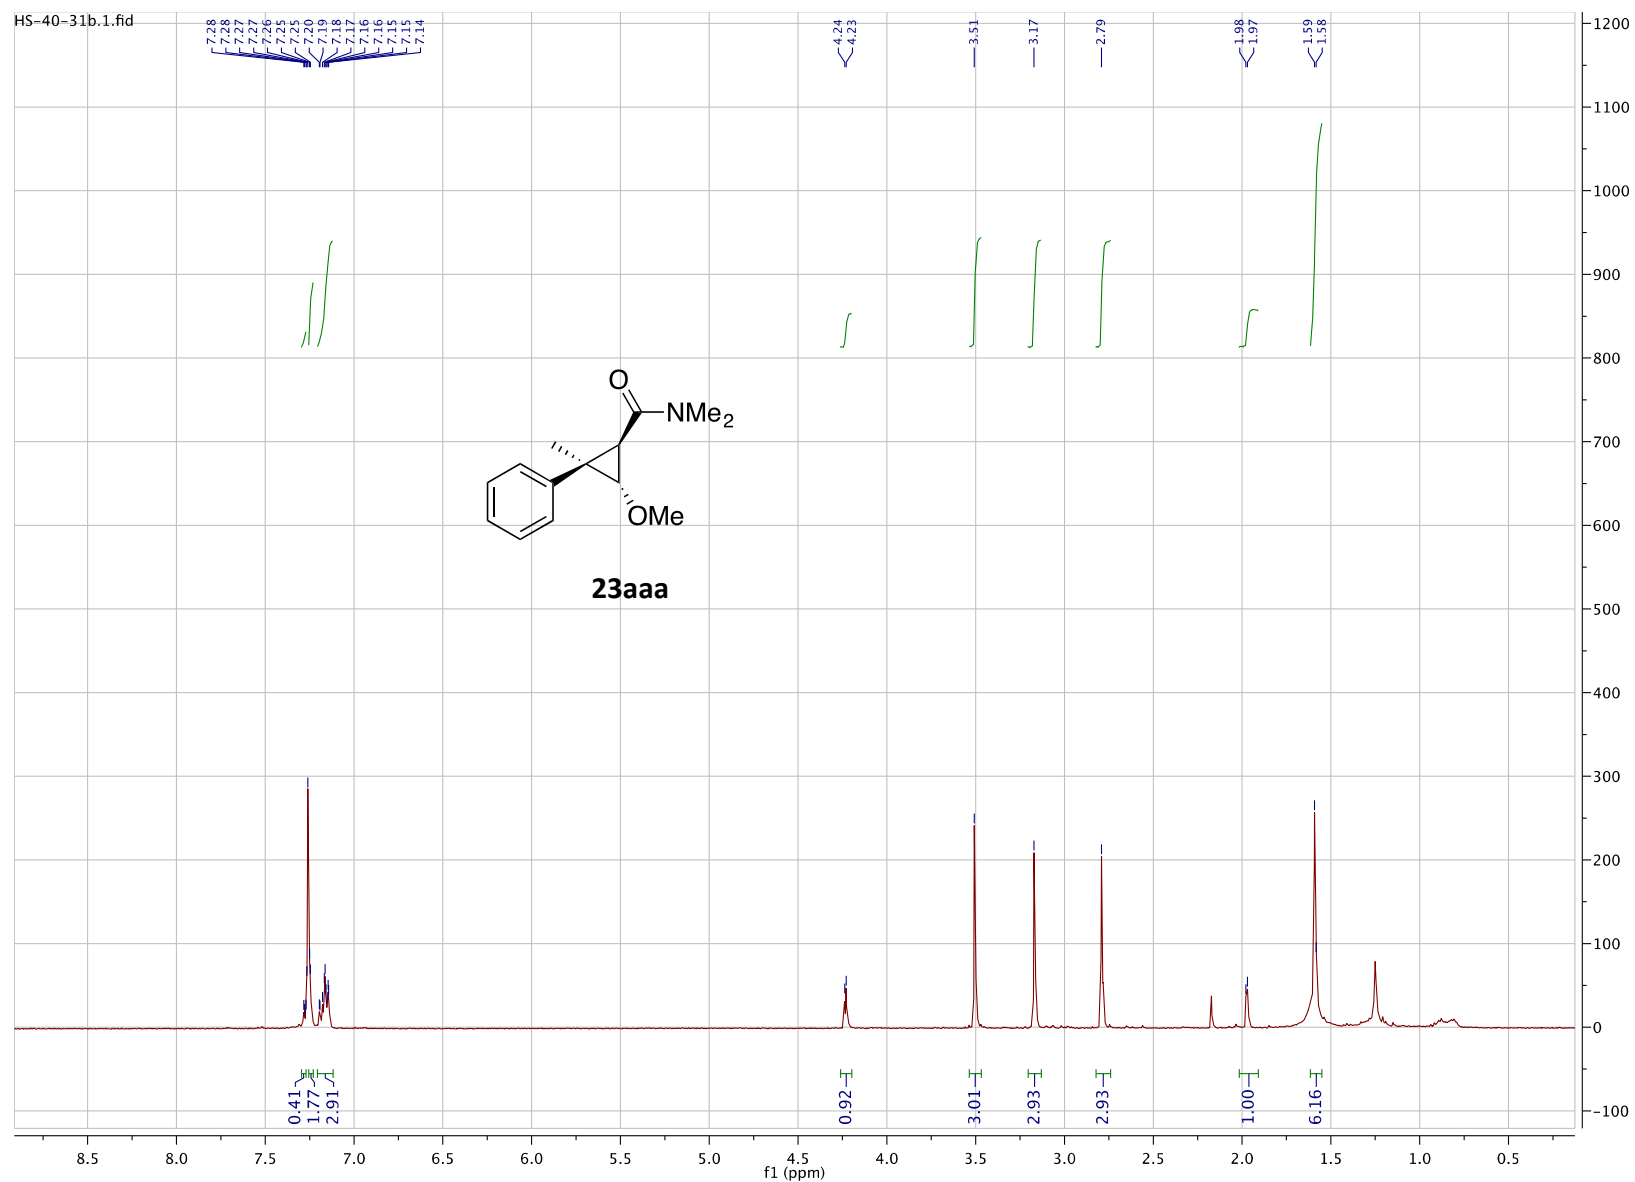

Figure S7.  $^1\text{H}$  NMR spectrum of compound **23aaa**



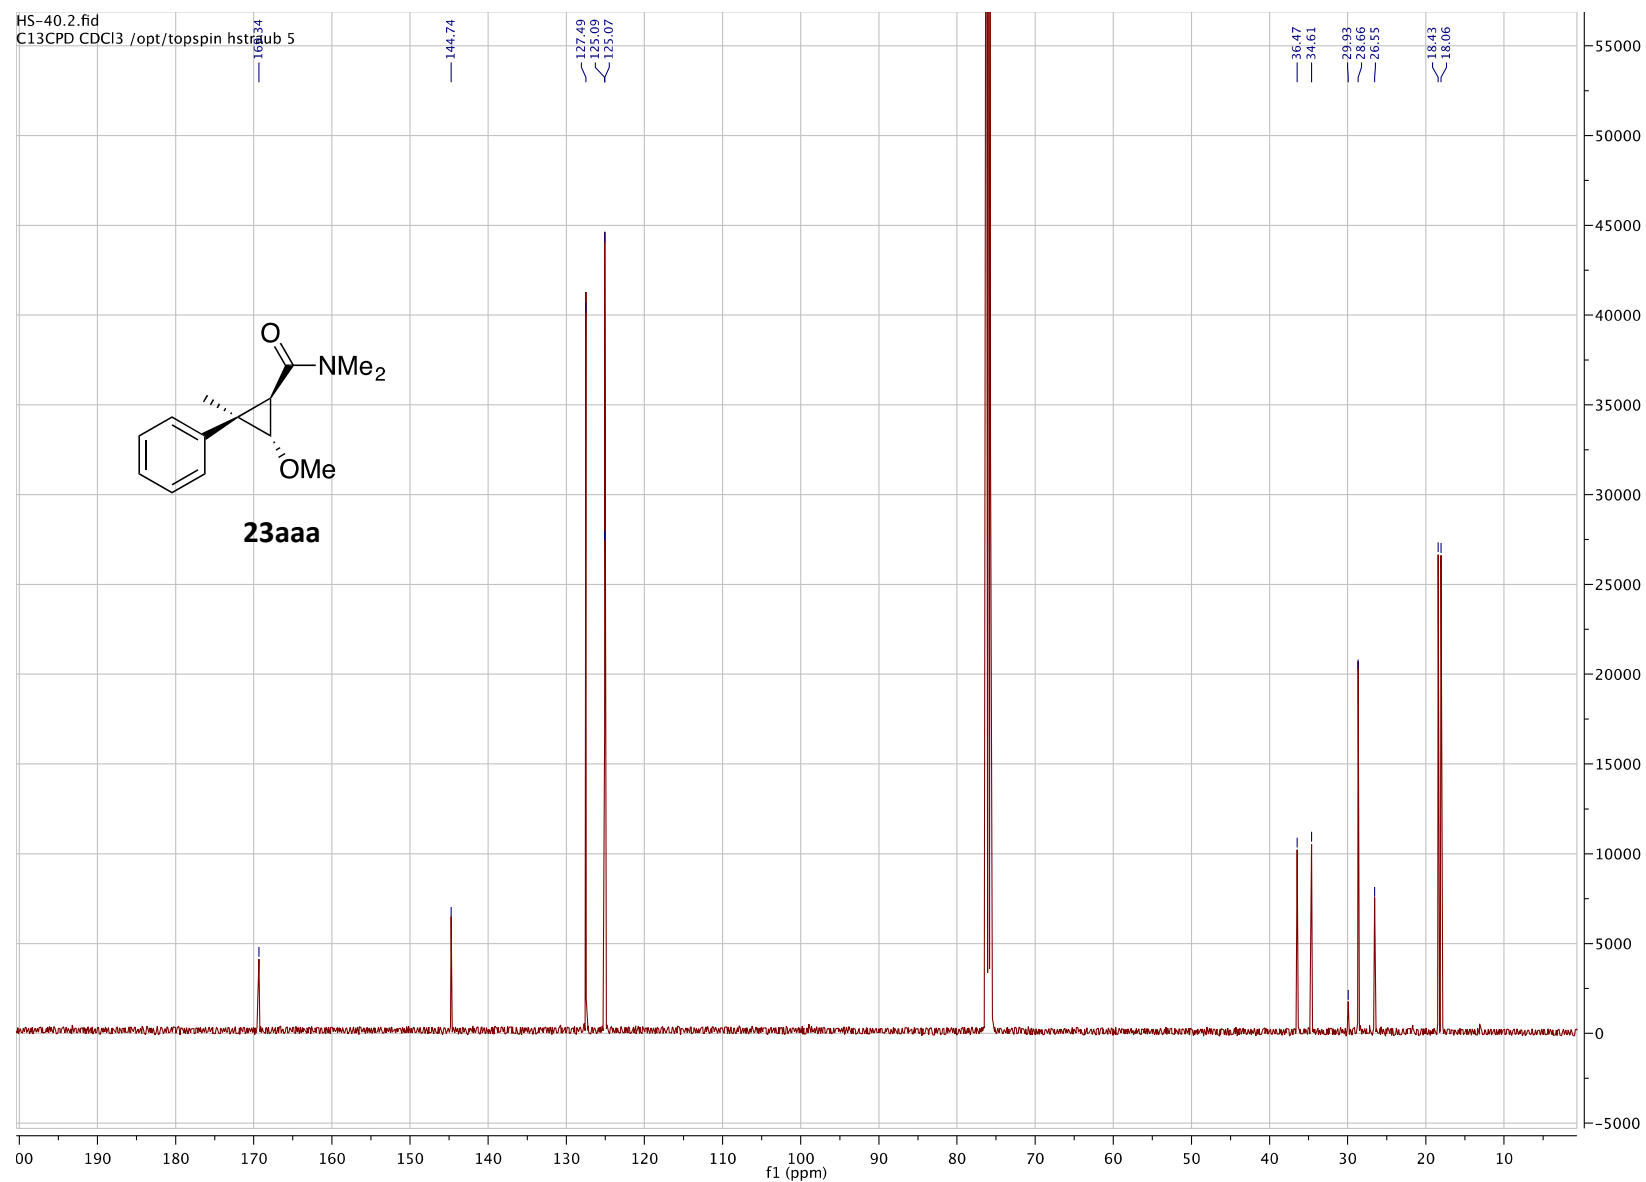

**Figure S8.**  $^{13}\text{C}$  NMR spectrum of compound **23aaa**

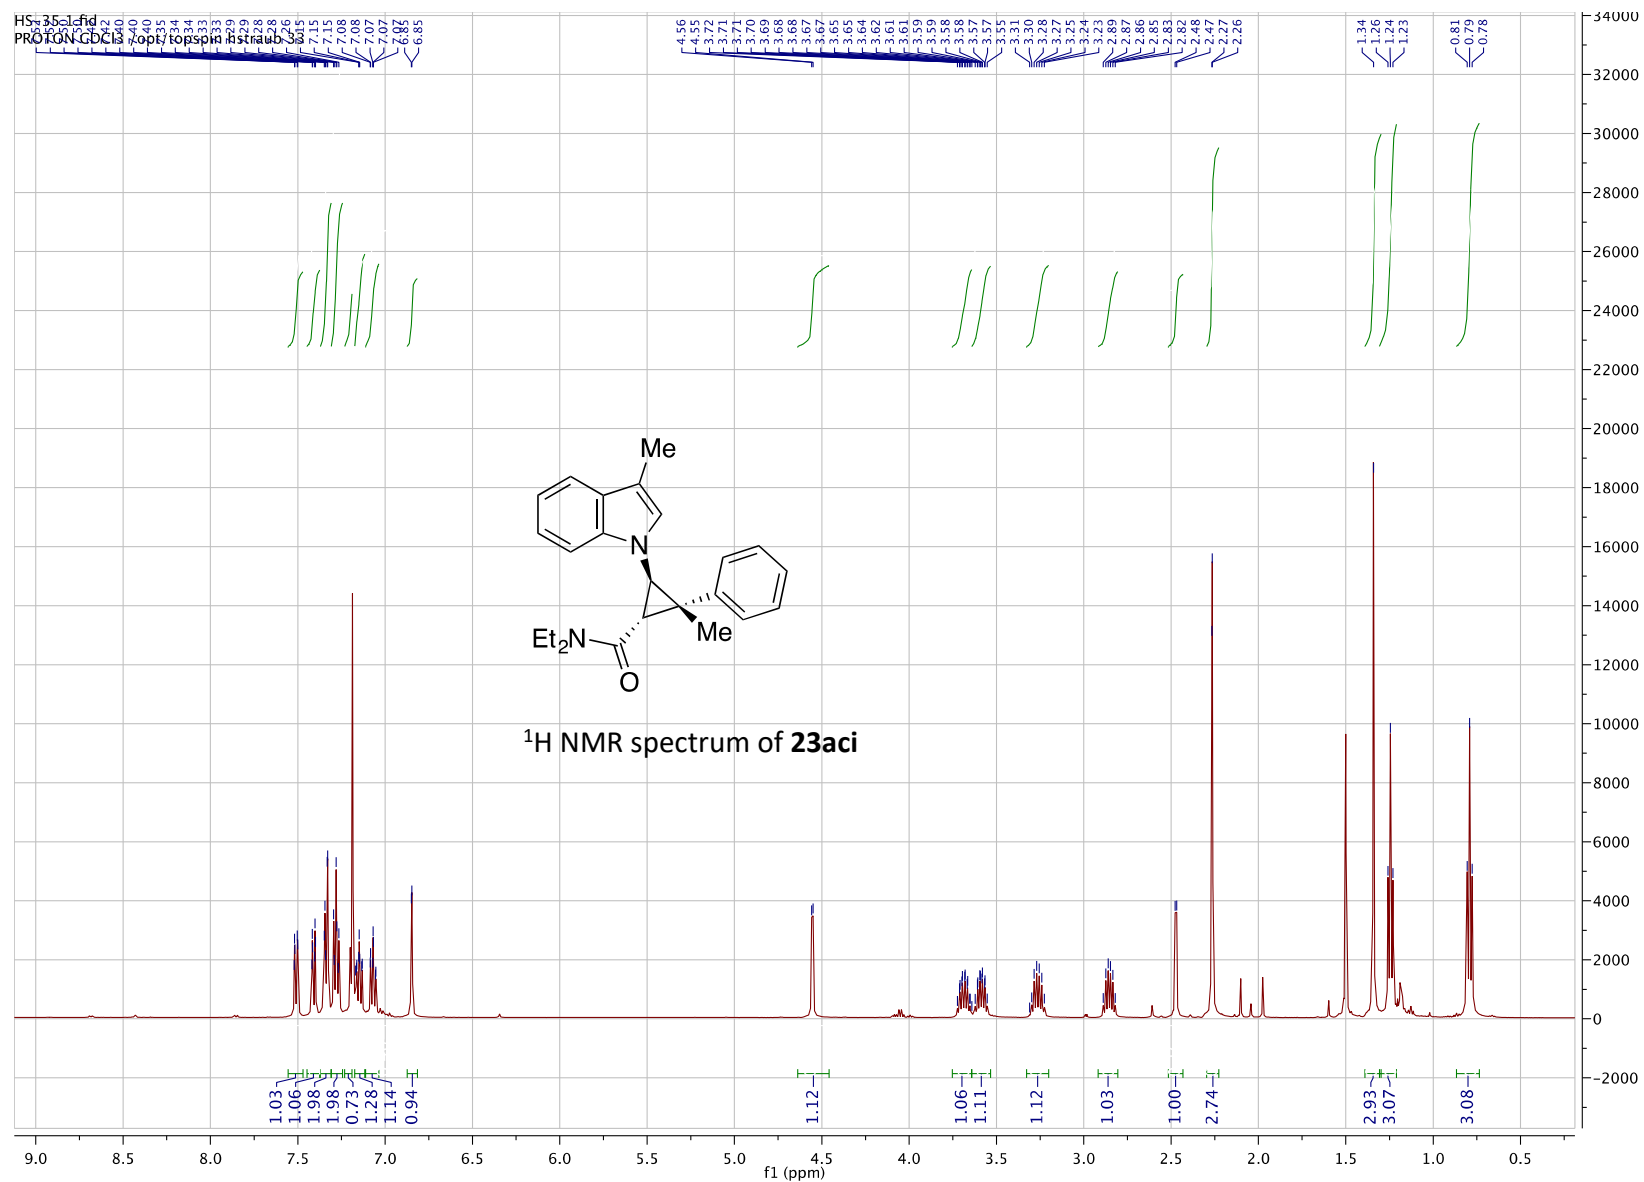

**Figure S9.** <sup>1</sup>H NMR spectrum of compound **23aci**

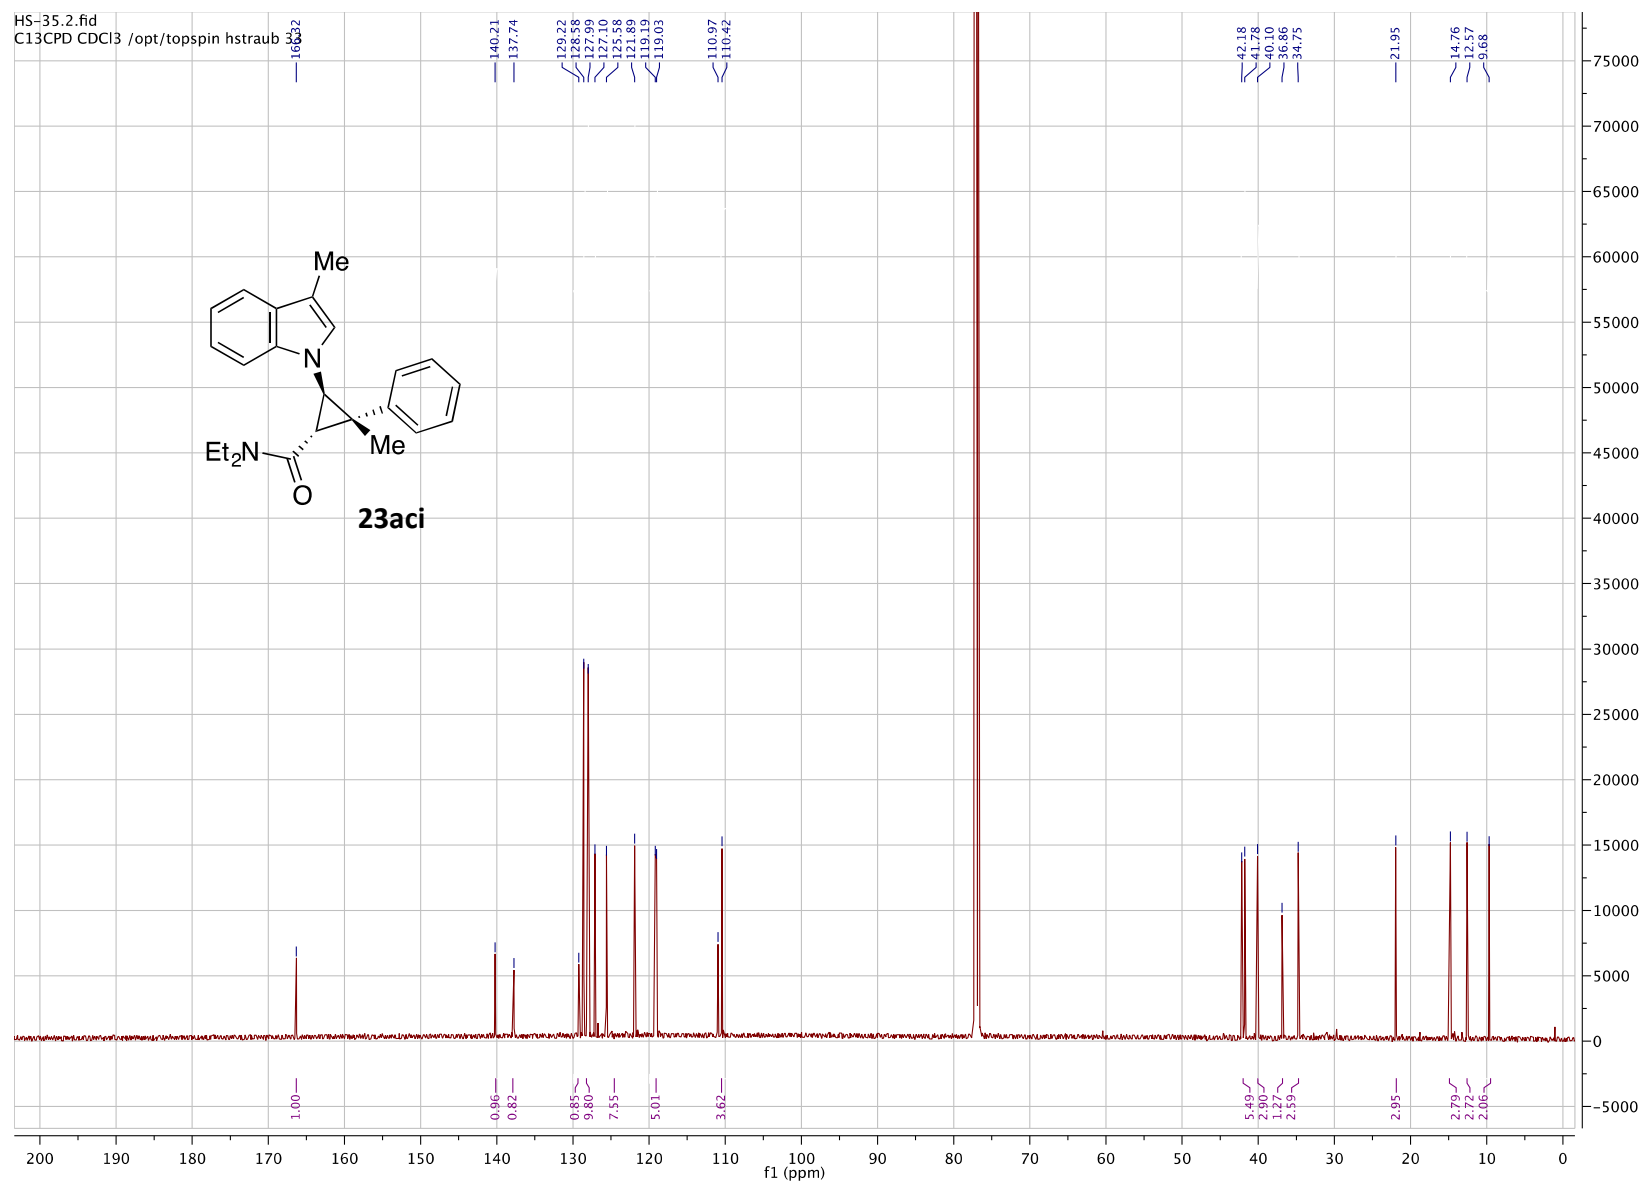

**Figure S10.**  $^{13}\text{C}$  NMR spectrum of compound **23aci**

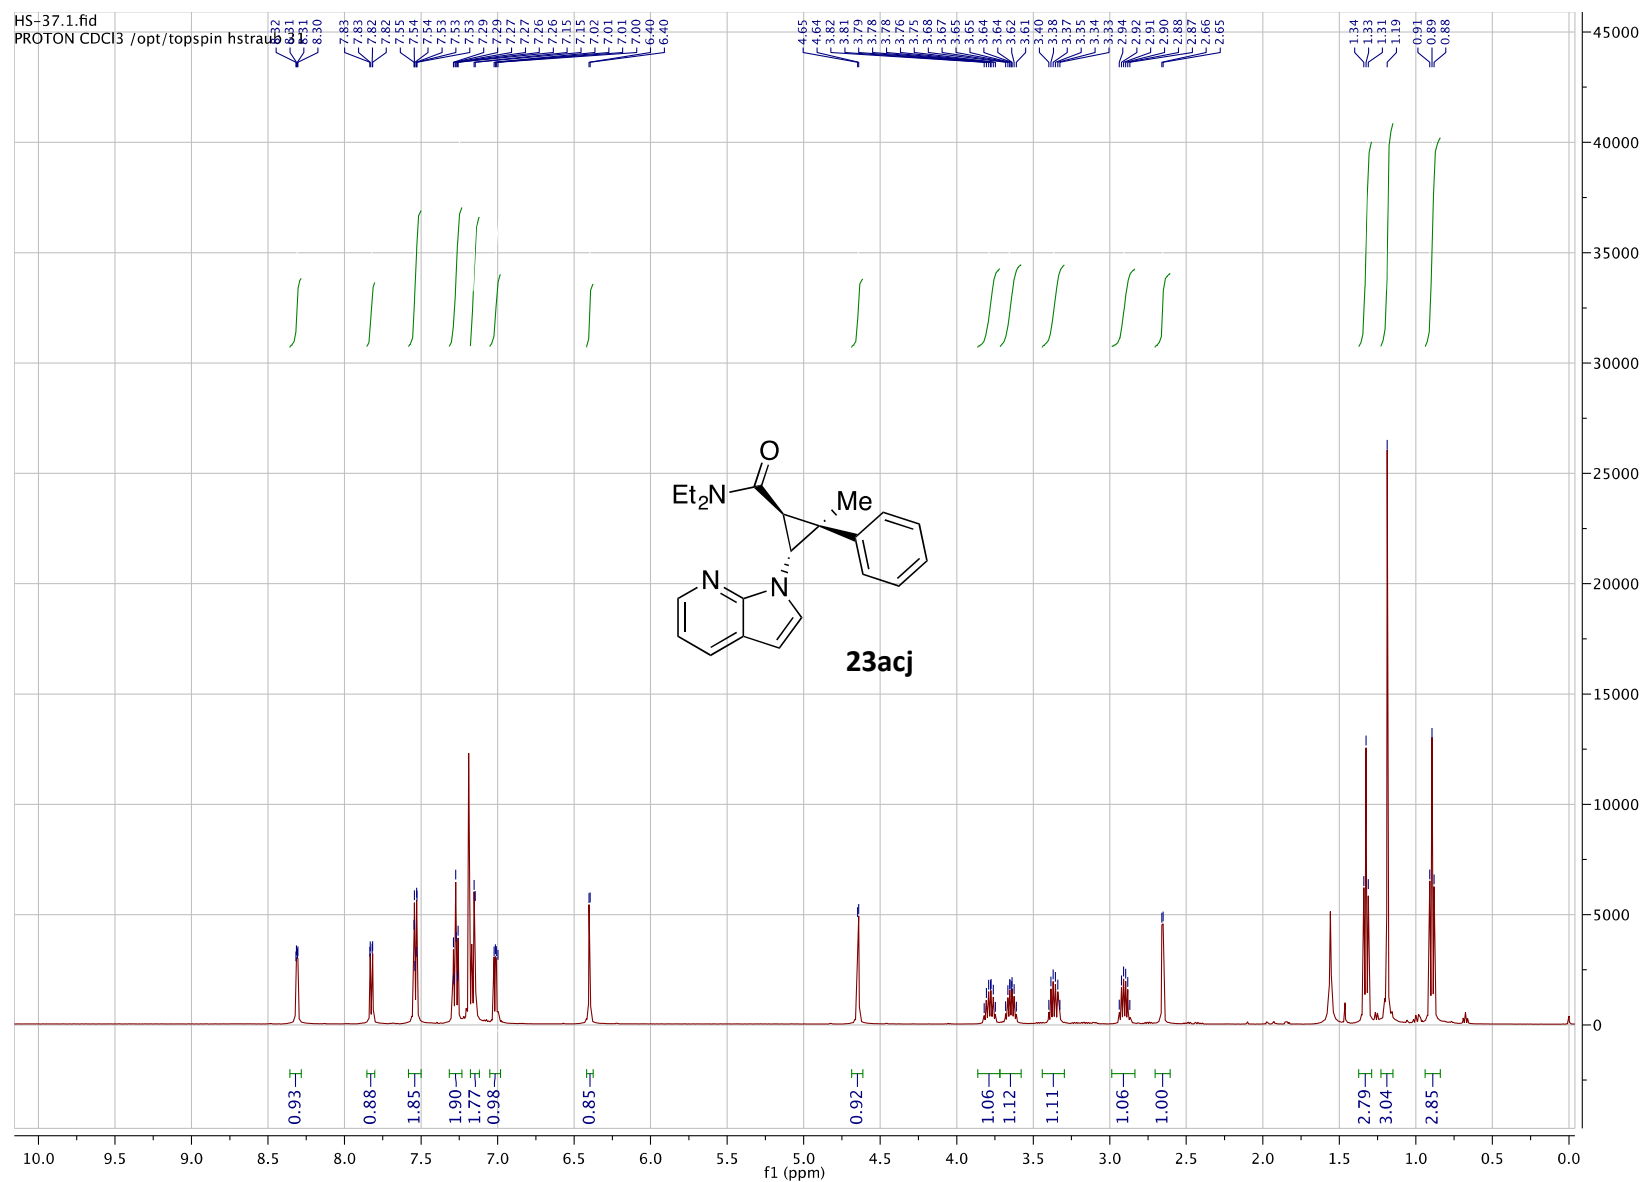

Figure S11.  $^1\text{H}$  NMR spectrum of compound **23acj**

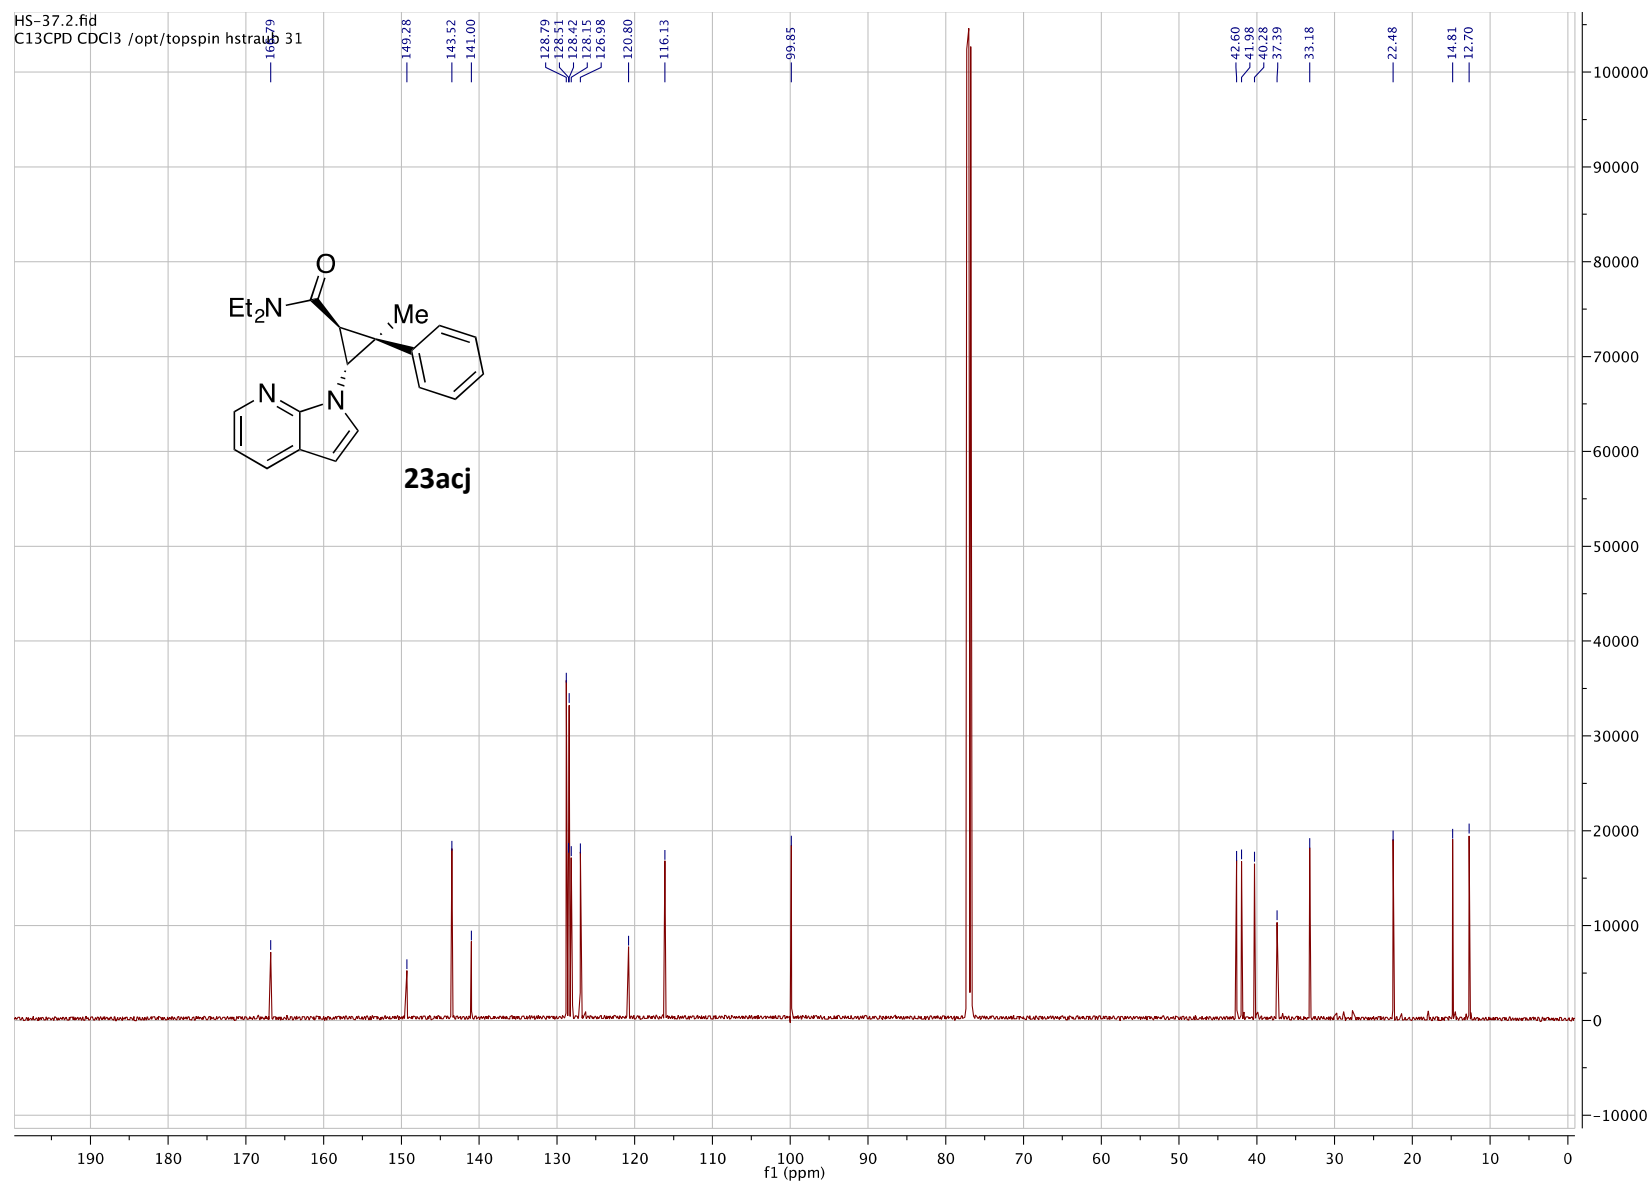

Figure S12.  $^{13}\text{C}$  NMR spectrum of compound **23acj**

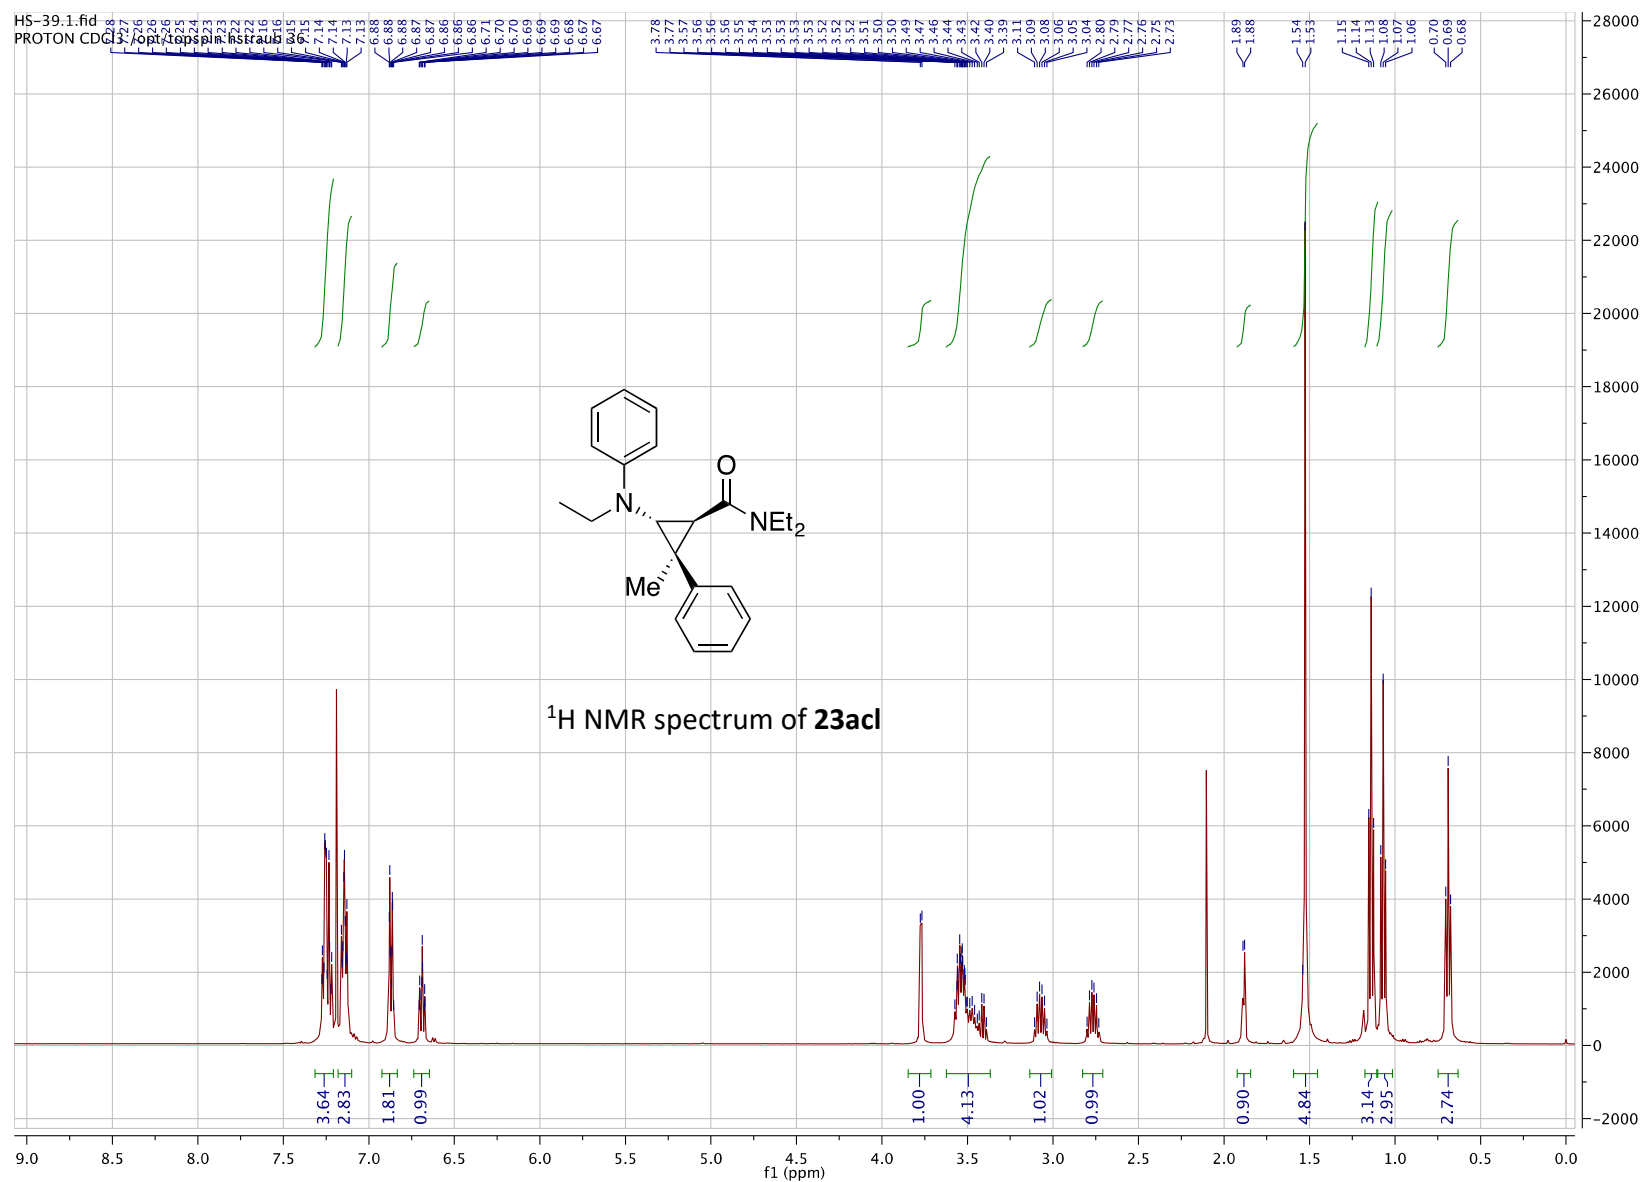

Figure S13. <sup>1</sup>H NMR spectrum of compound **23acl**

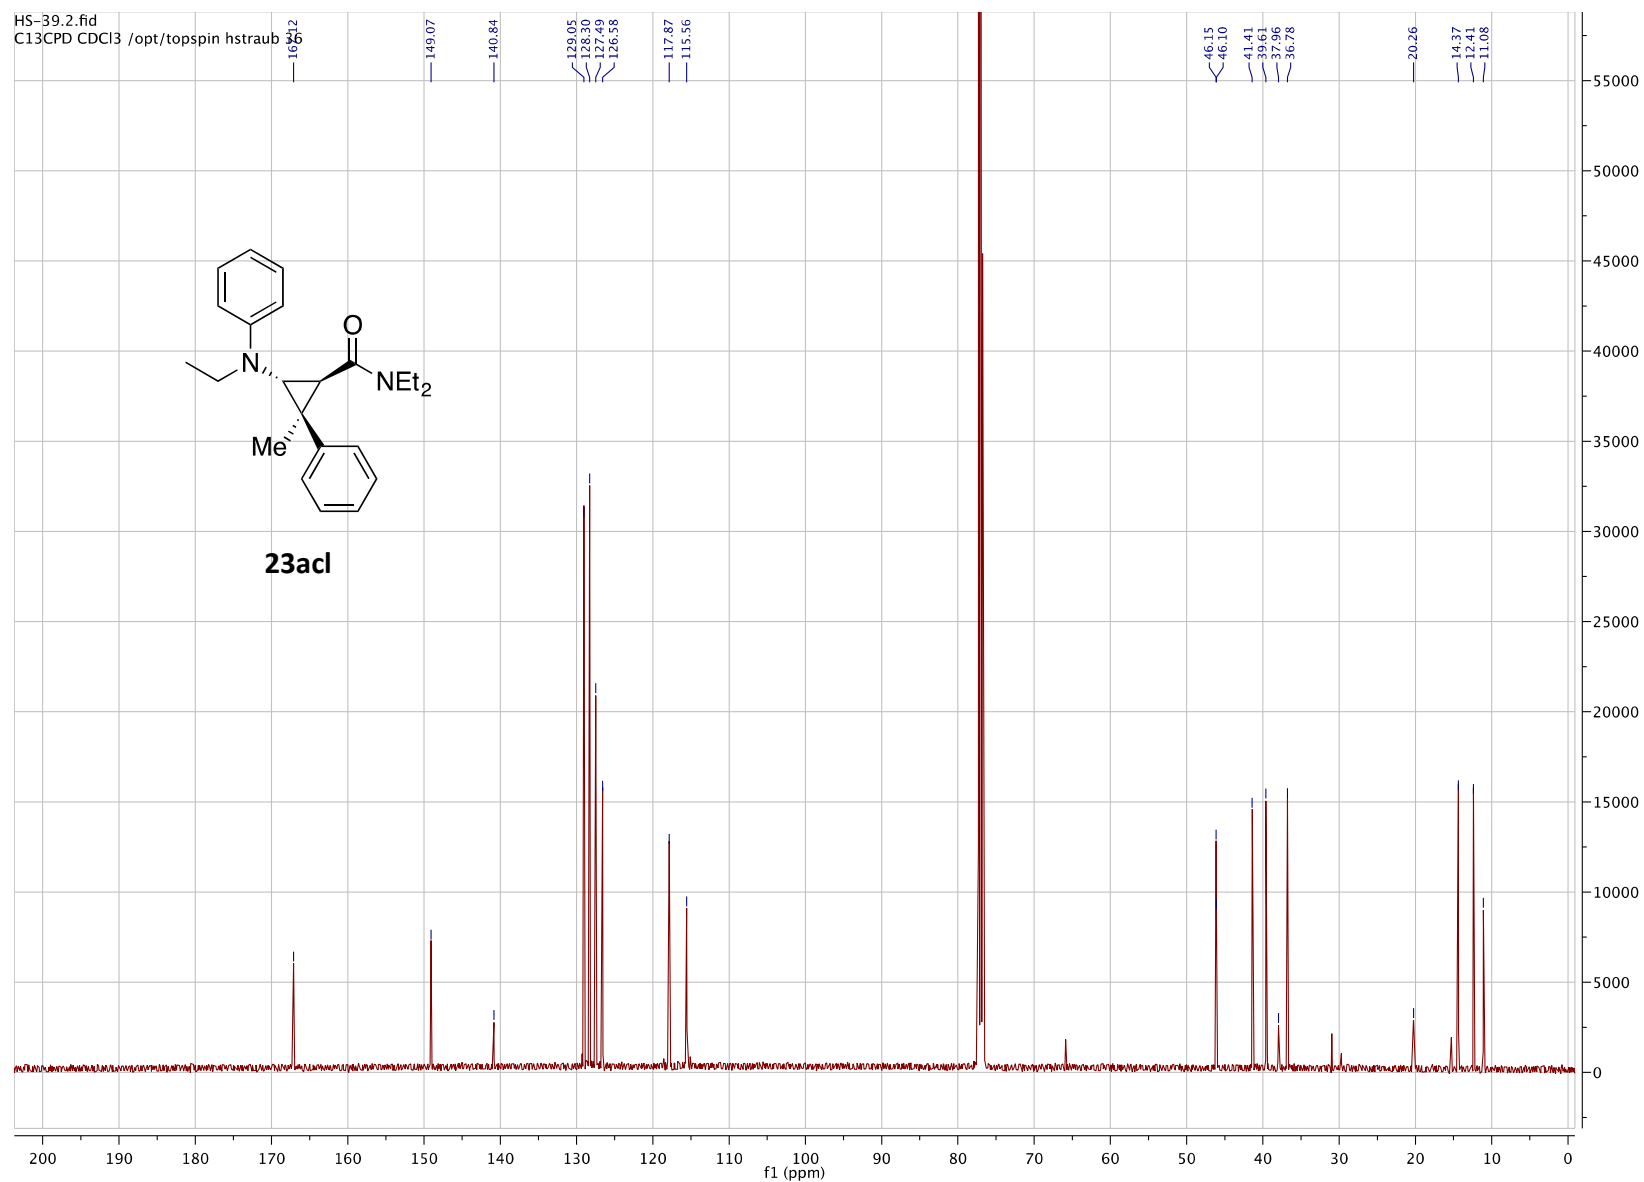

Figure S14.  $^{13}\text{C}$  NMR spectrum of compound **23acl**

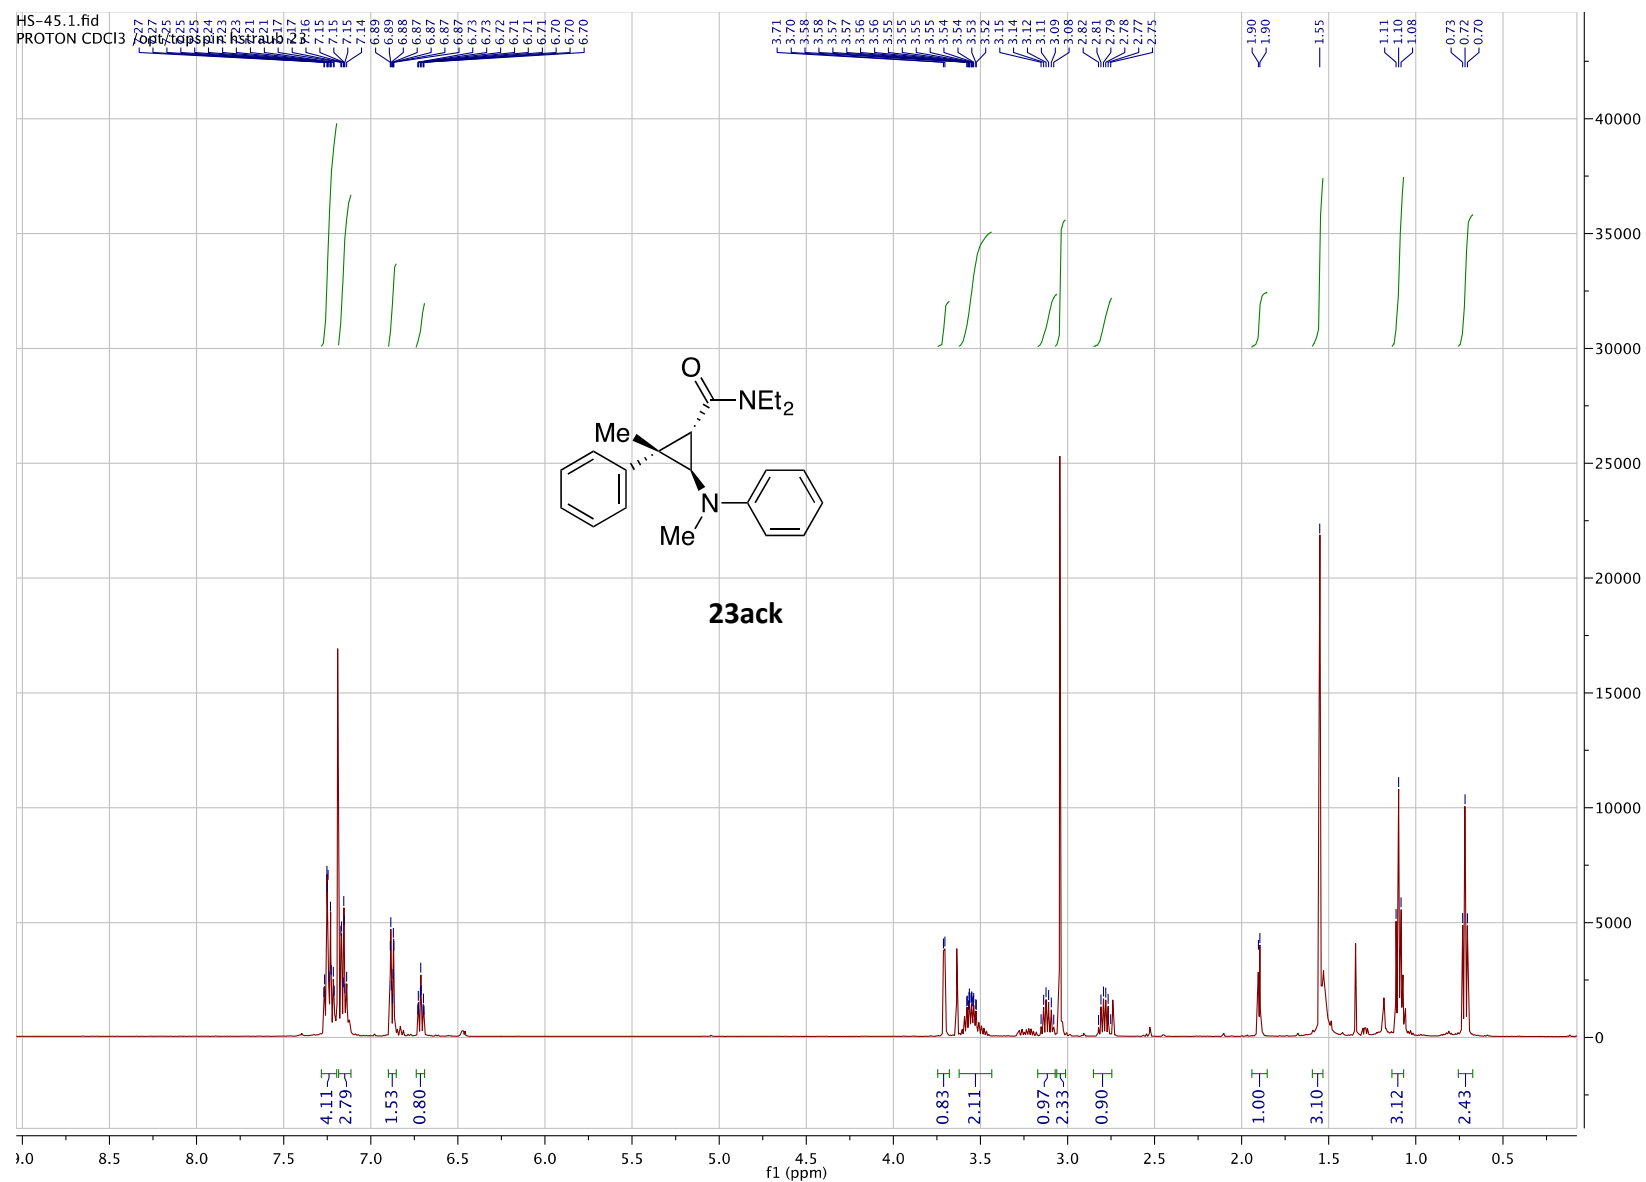

**Figure S15.**  $^1\text{H}$  NMR spectrum of compound **23ack**



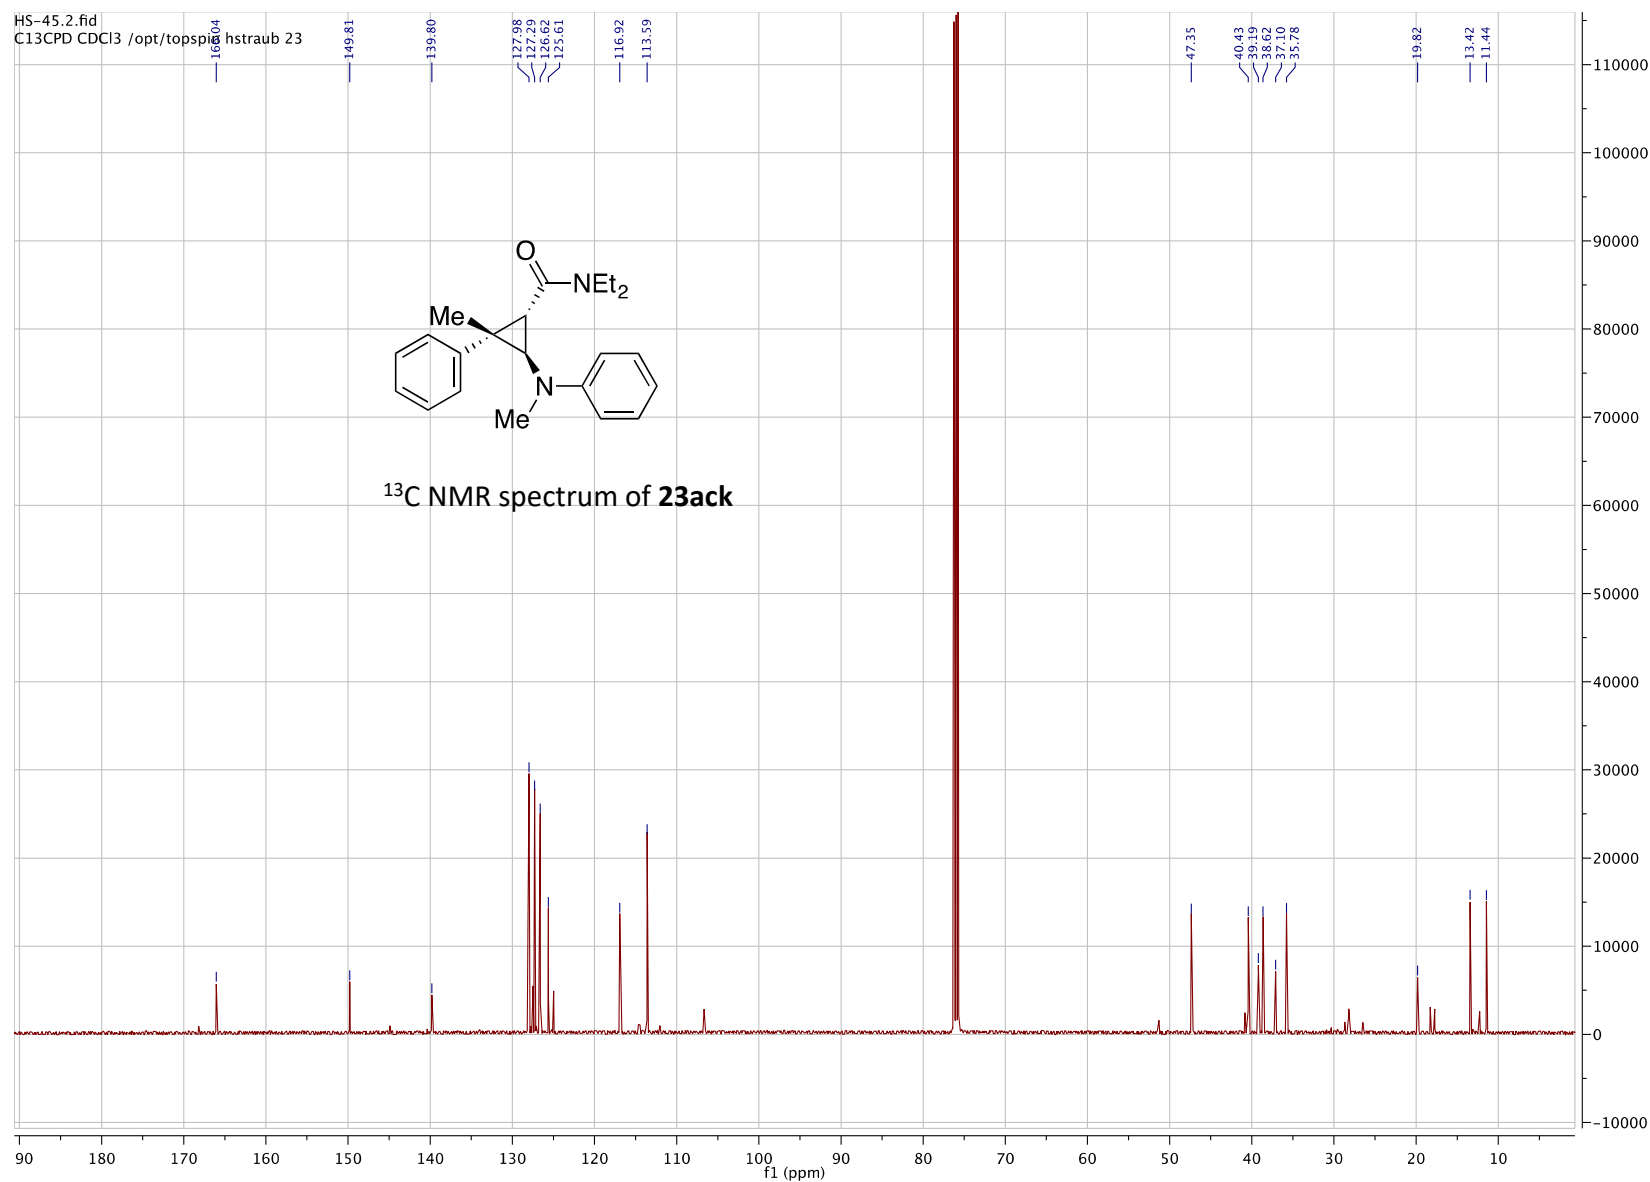

Figure S16. <sup>13</sup>C NMR spectrum of compound **23ack**

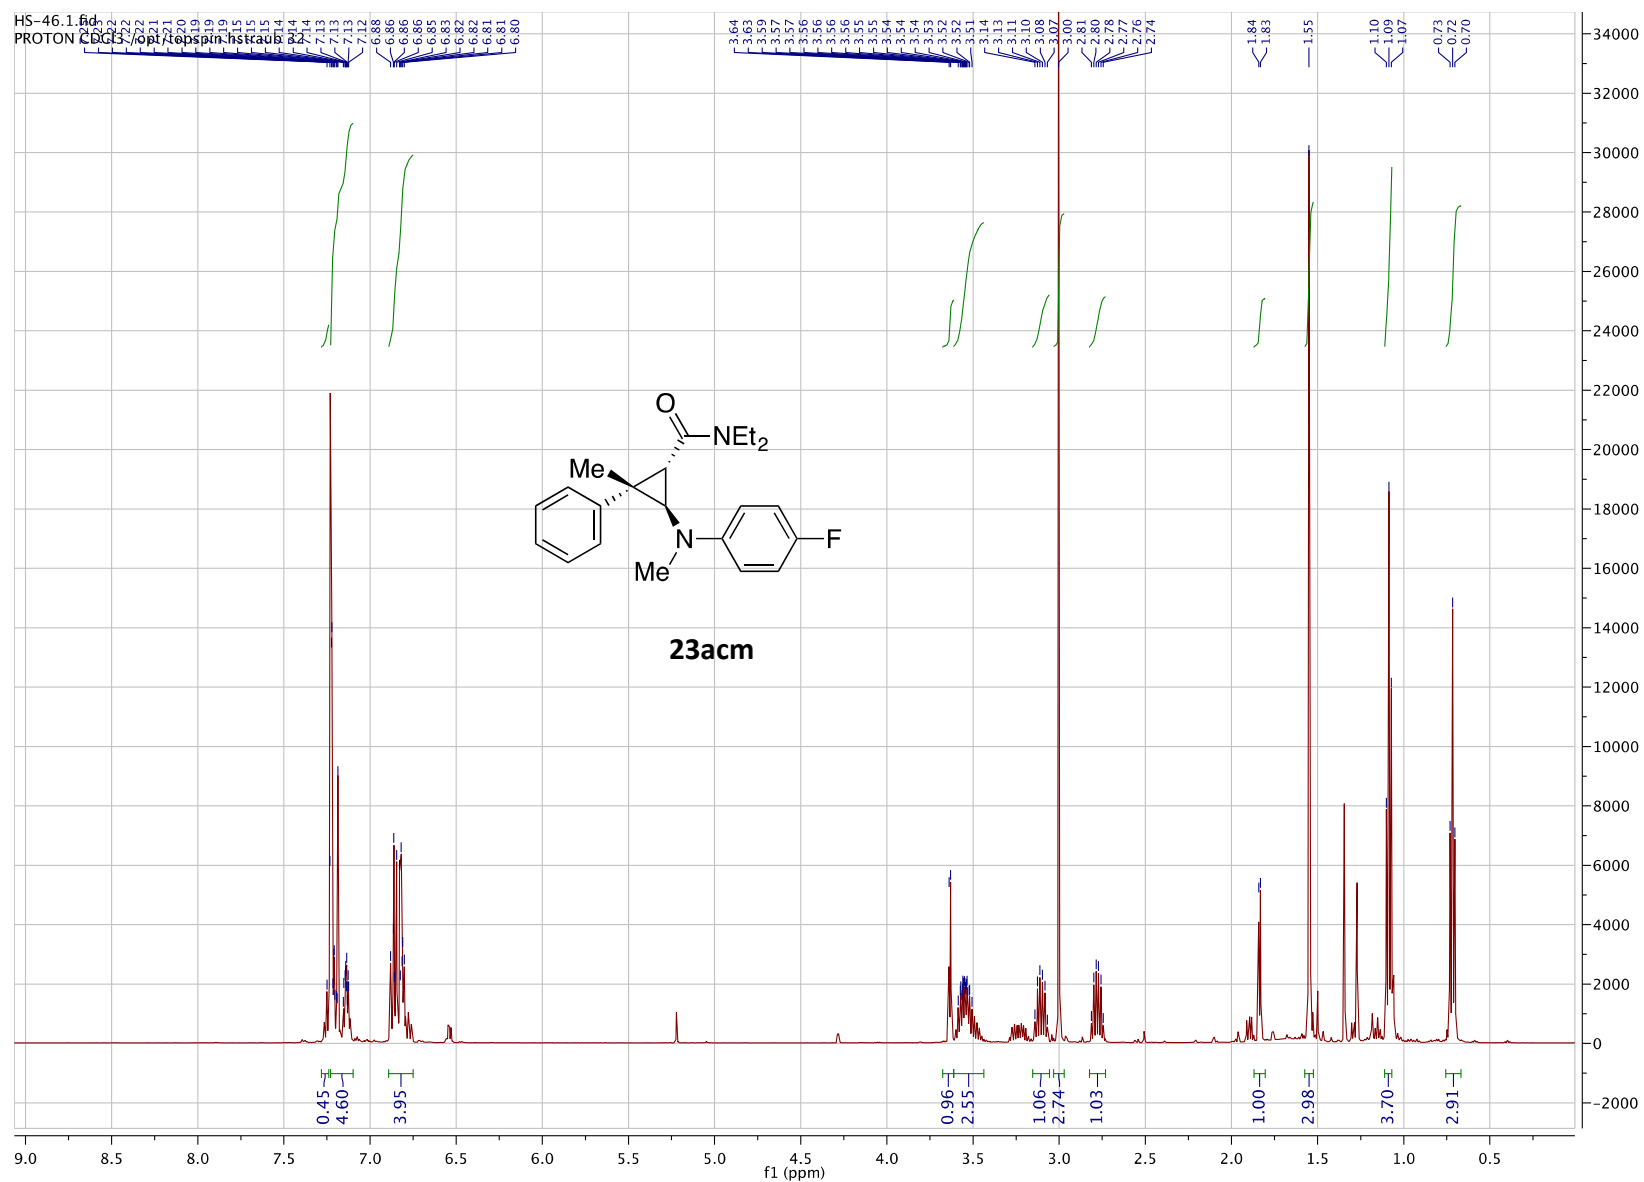

**Figure S17.** <sup>1</sup>H NMR spectrum of compound **23acm**

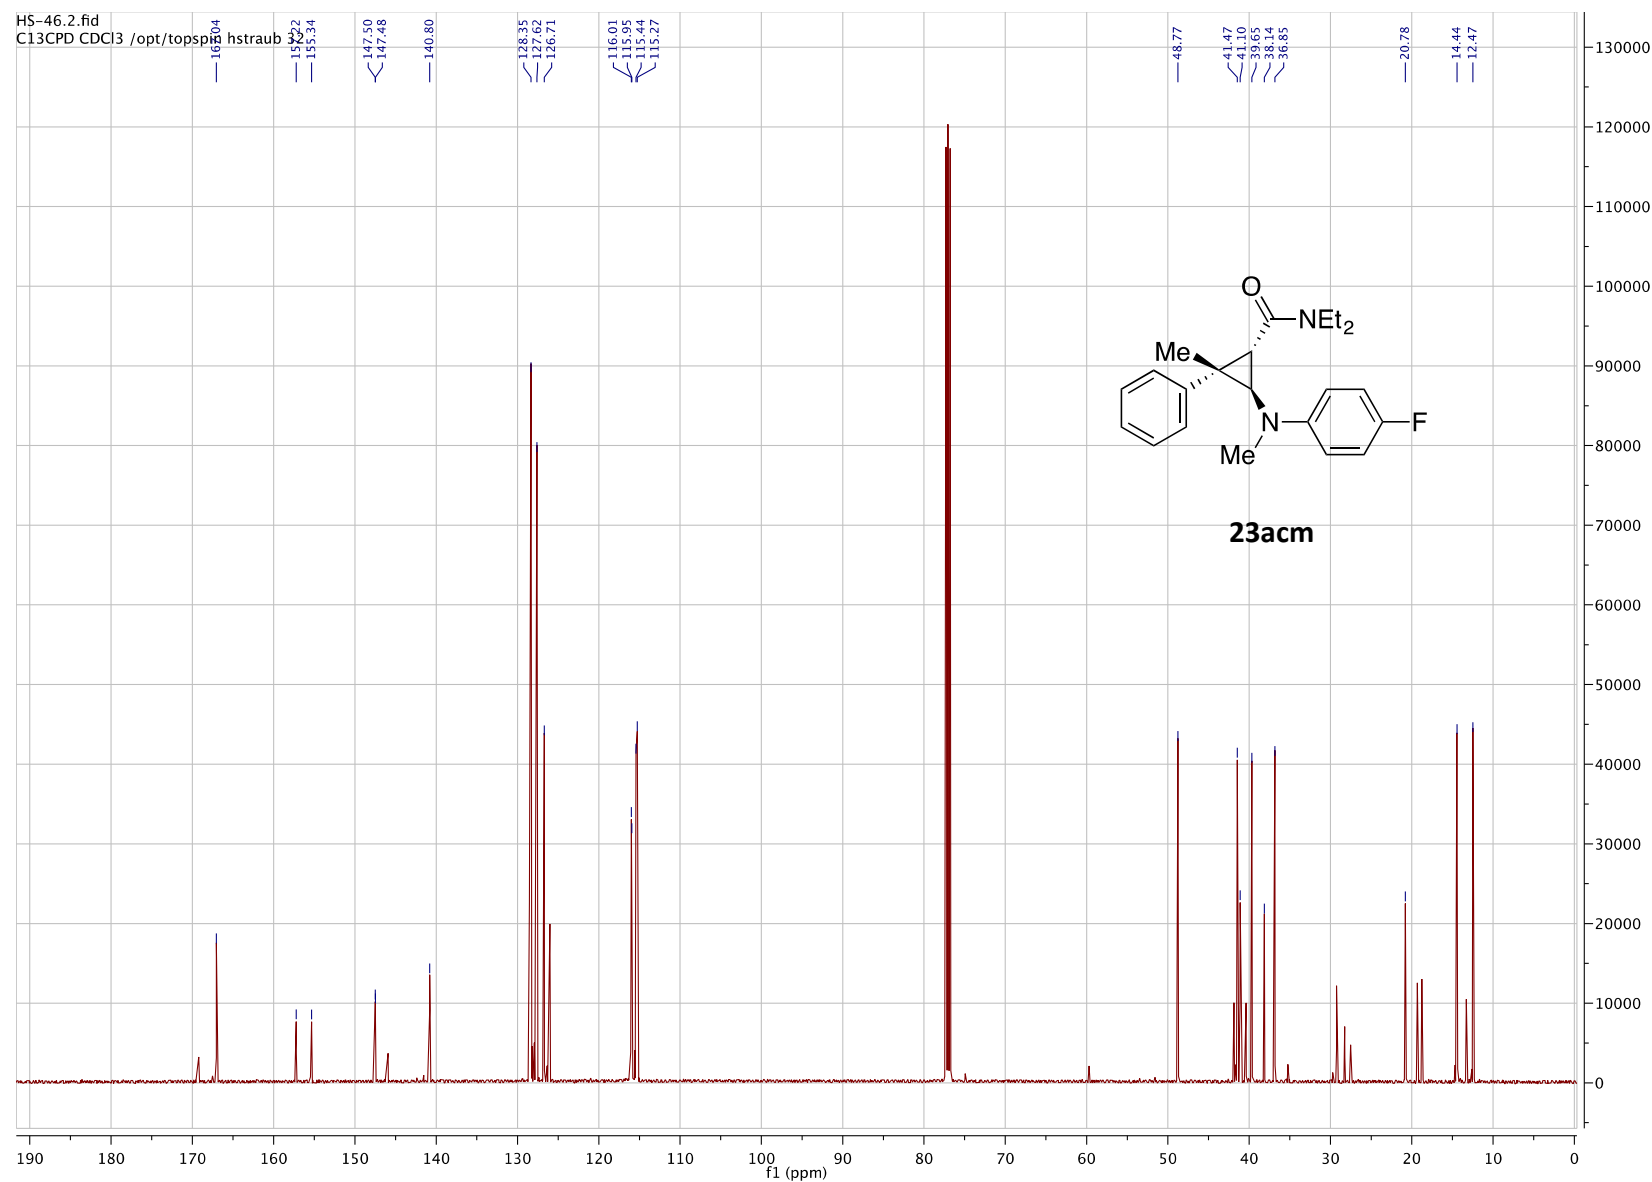

**Figure S18.**  $^{13}\text{C}$  NMR spectrum of compound **23acm**

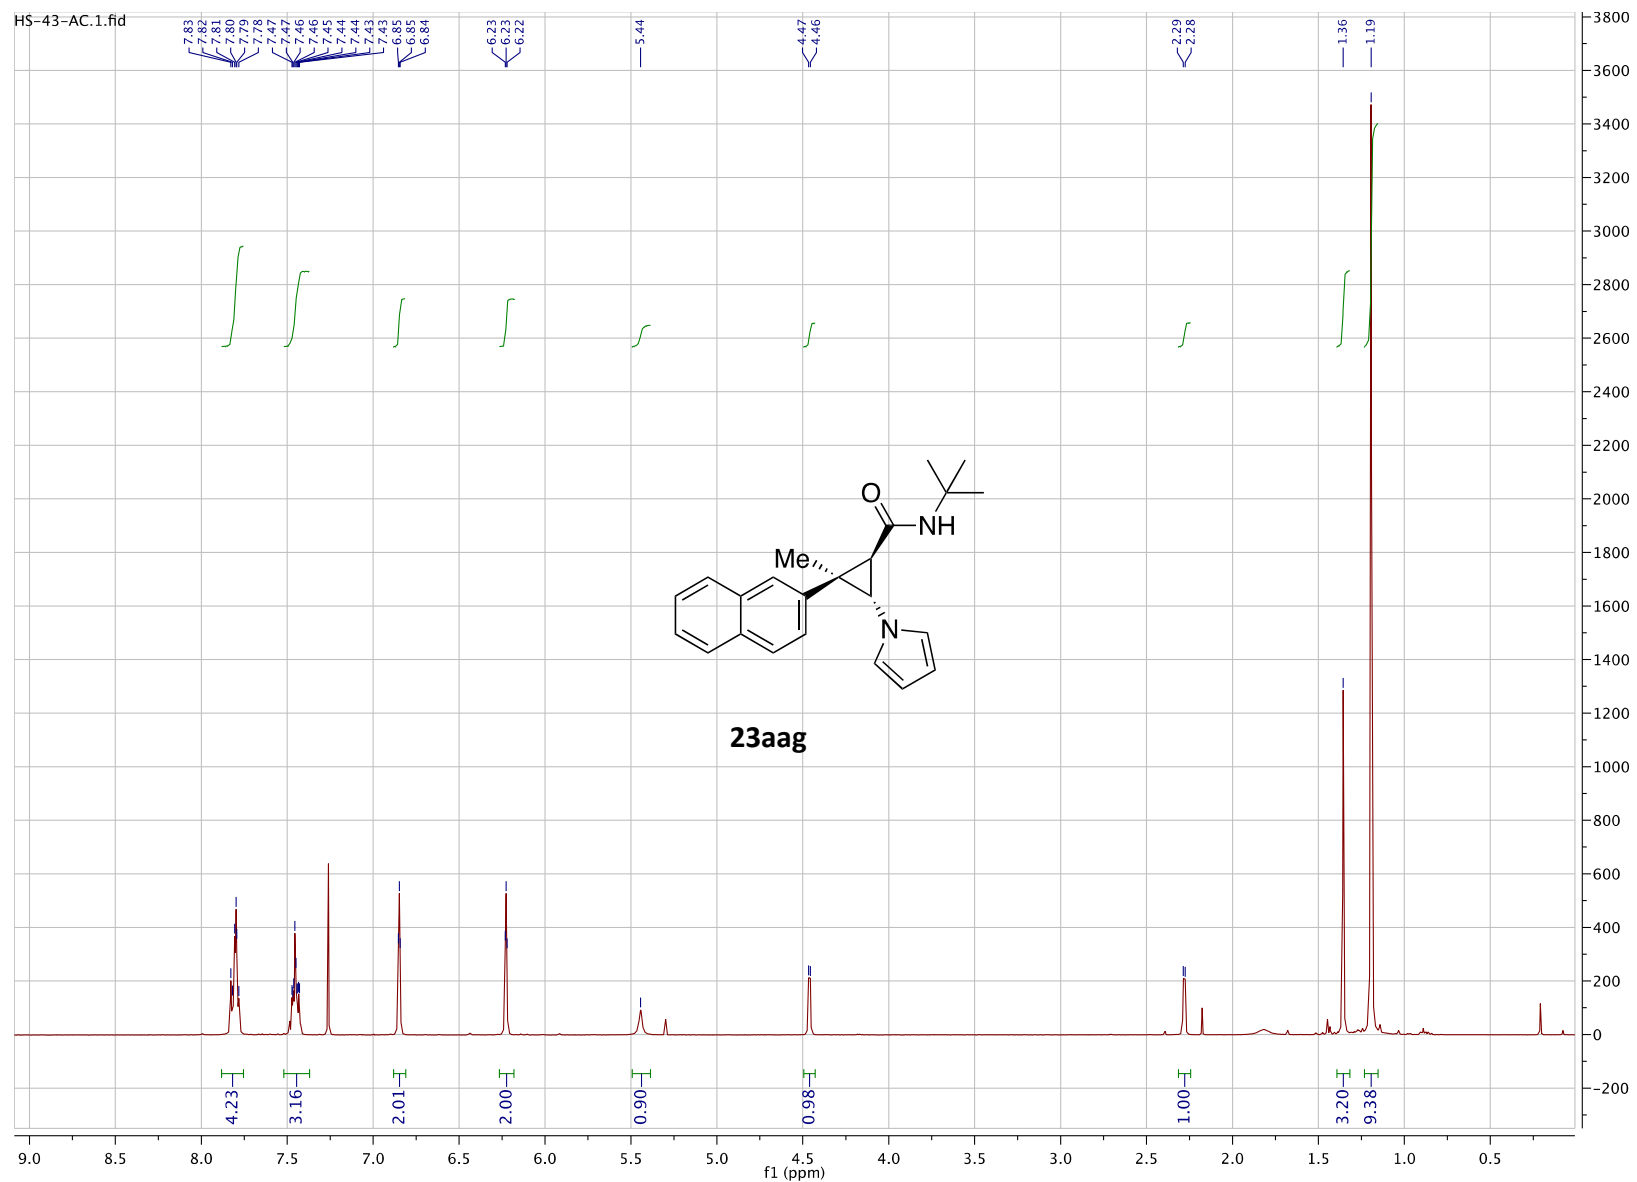

**Figure S19.**  $^1\text{H}$  NMR spectrum of compound **23aag**

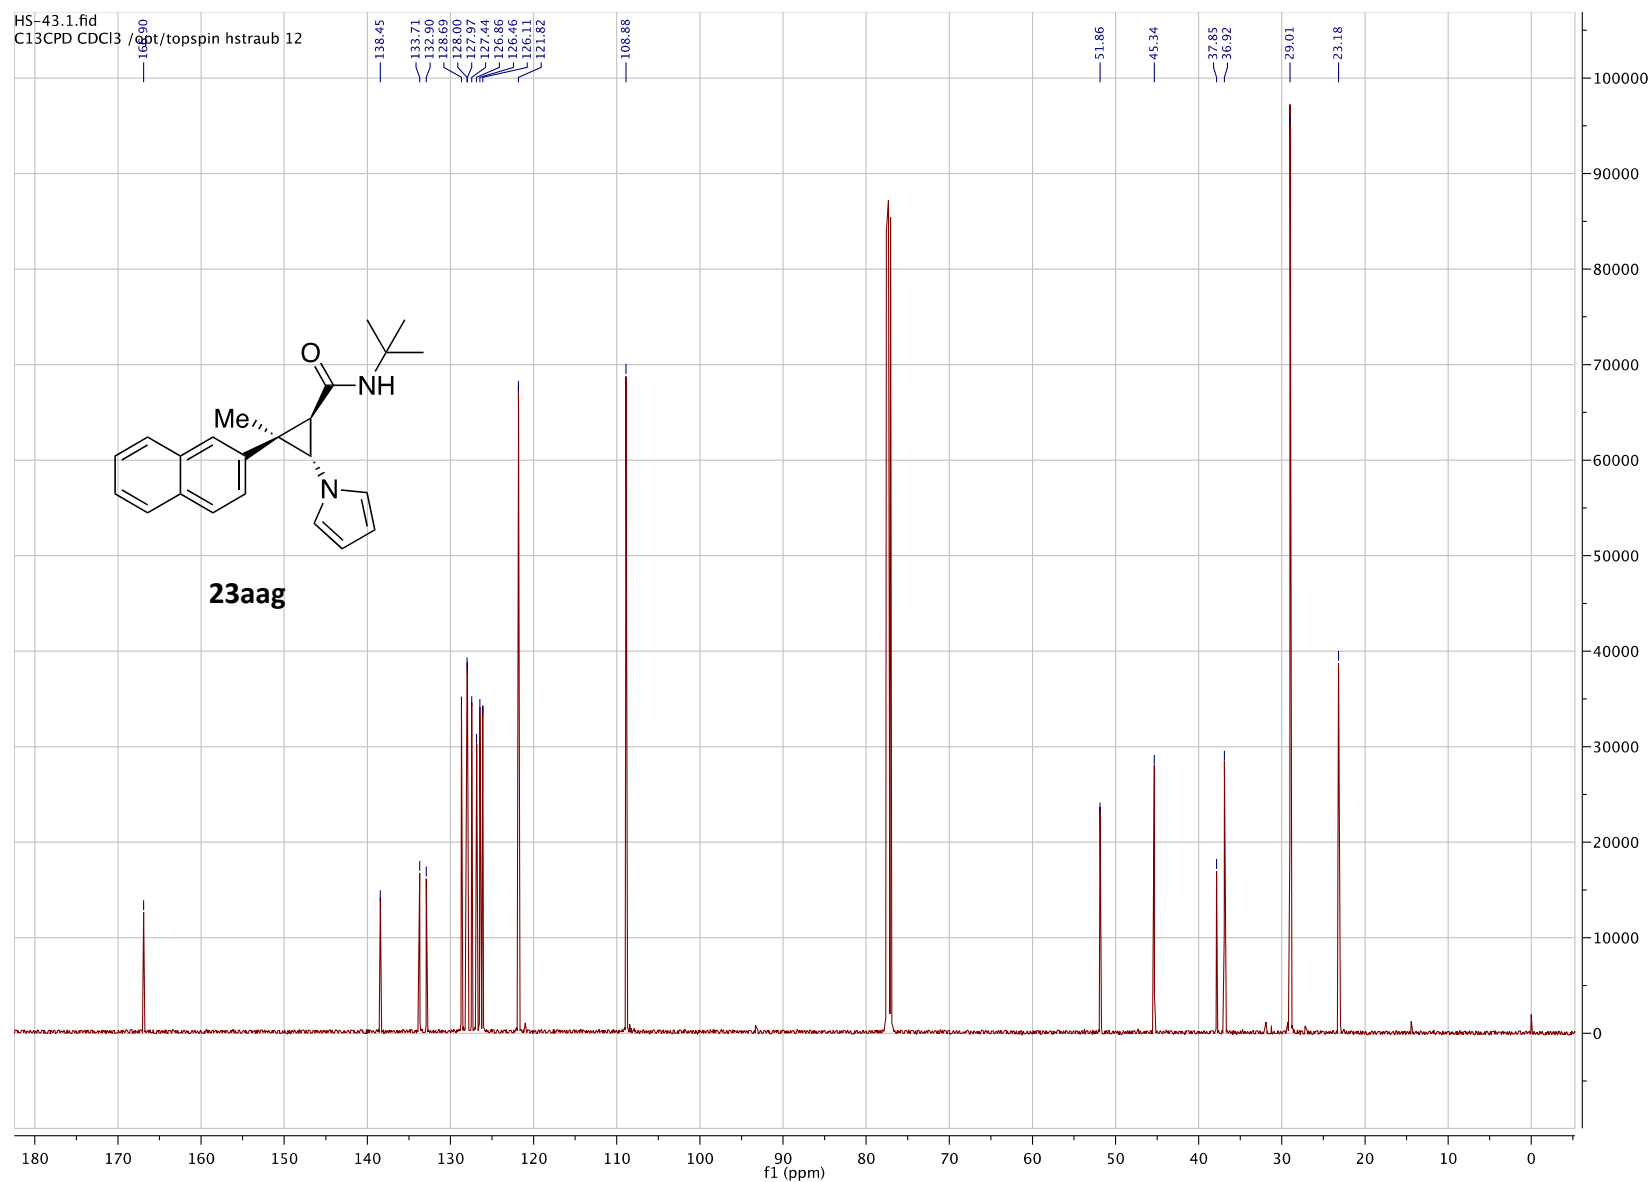

**Figure S20.**  $^{13}\text{C}$  NMR spectrum of compound **23aag**

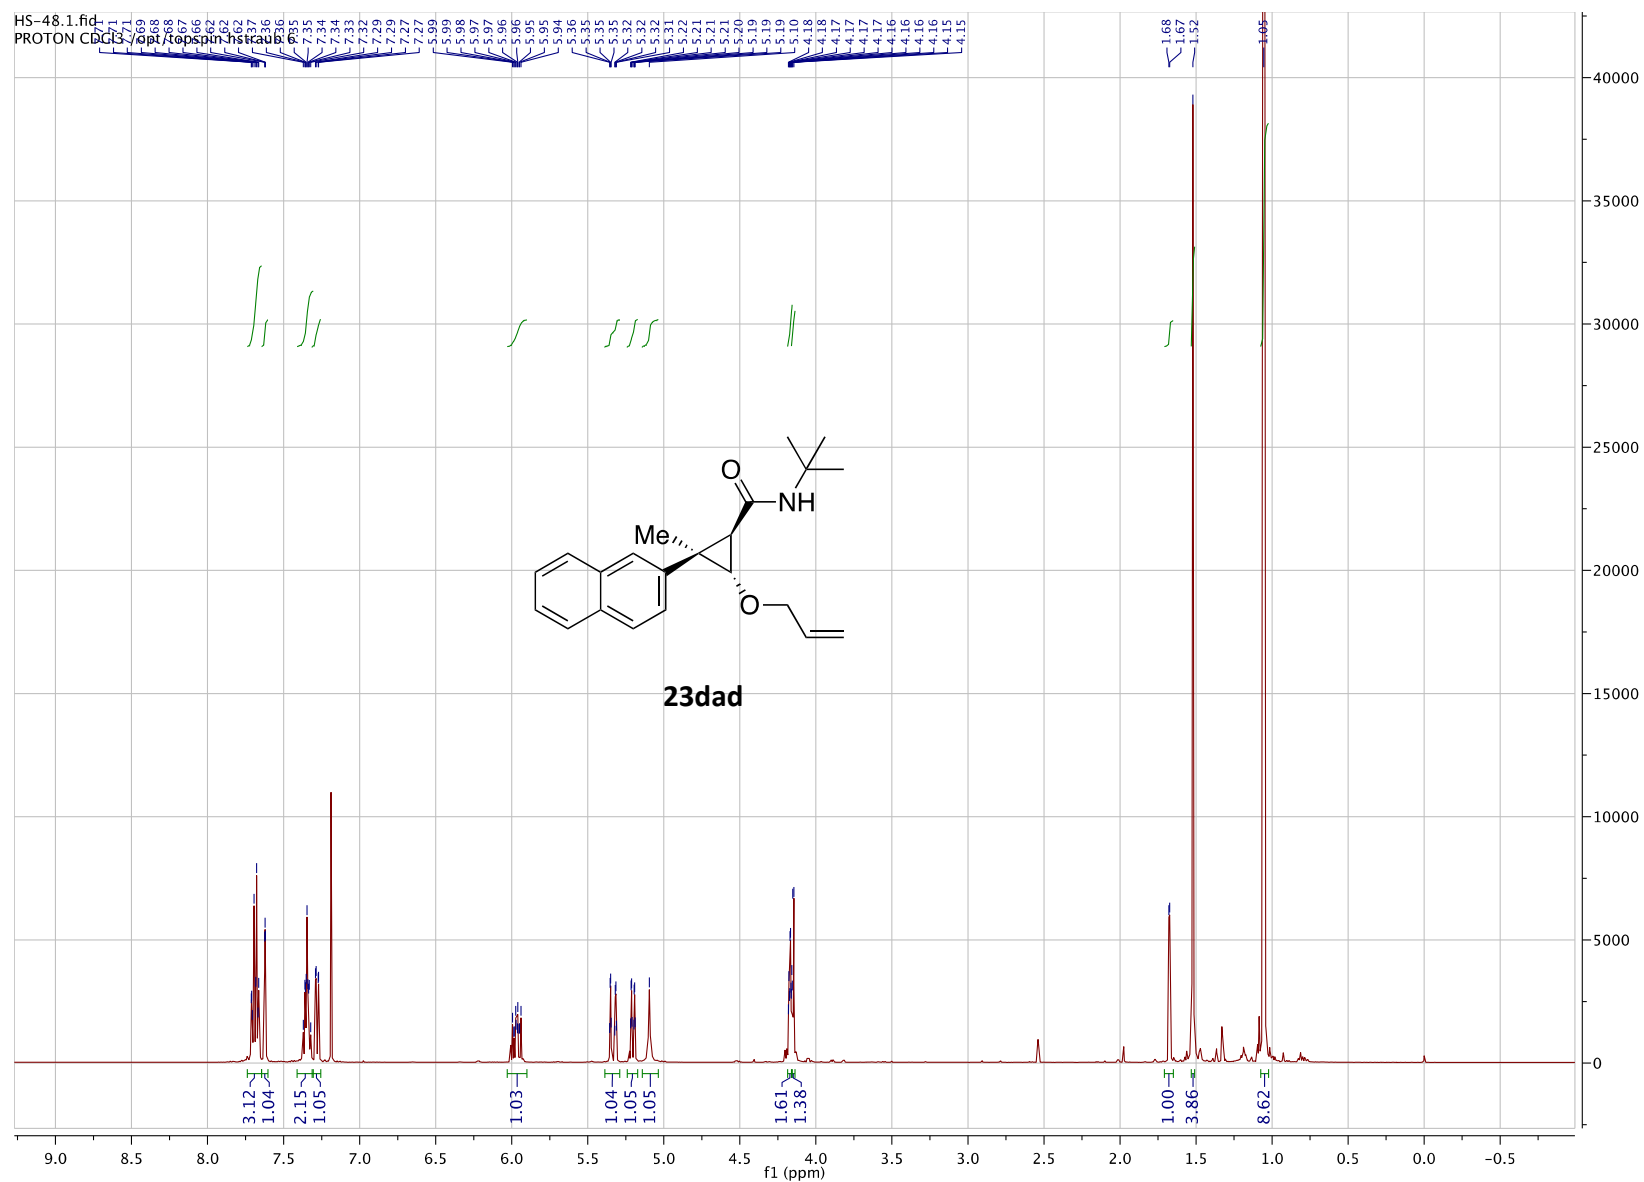

Figure S21. <sup>1</sup>H NMR spectrum of compound **23dad**

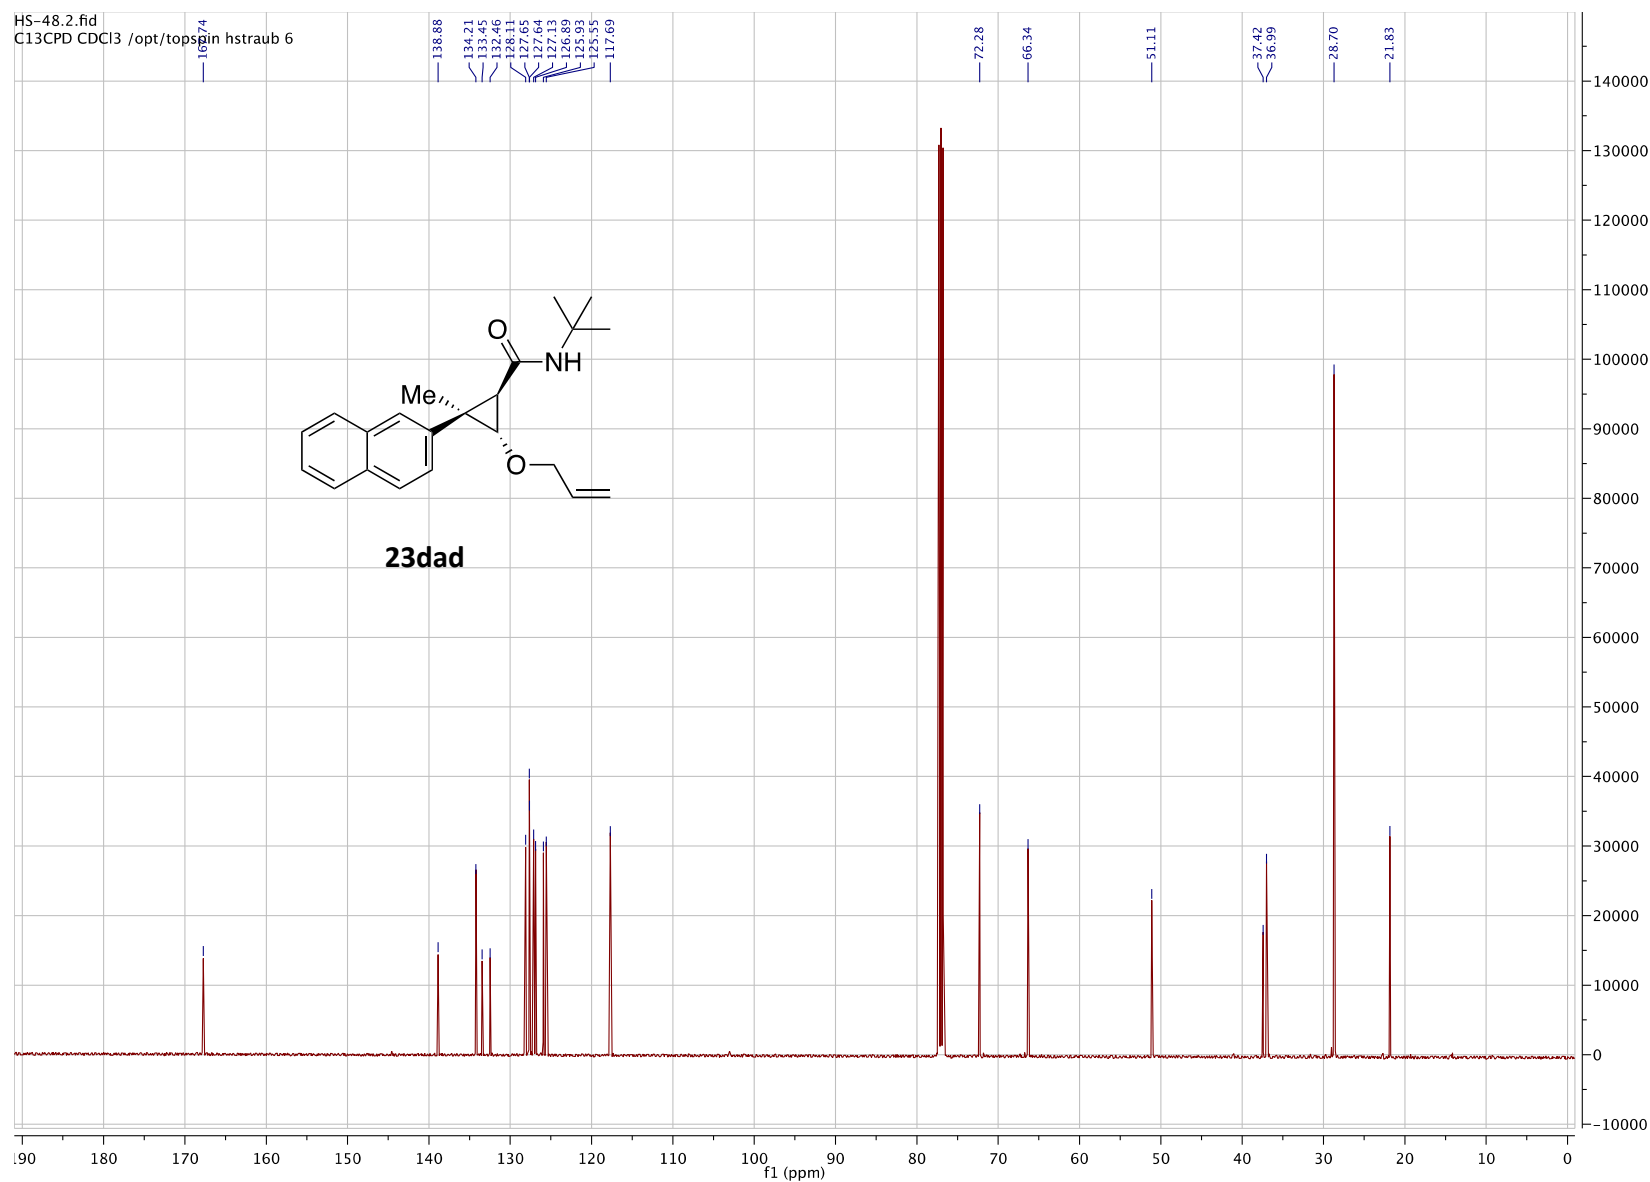

**Figure S22.**  $^{13}\text{C}$  NMR spectrum of compound **23dad**

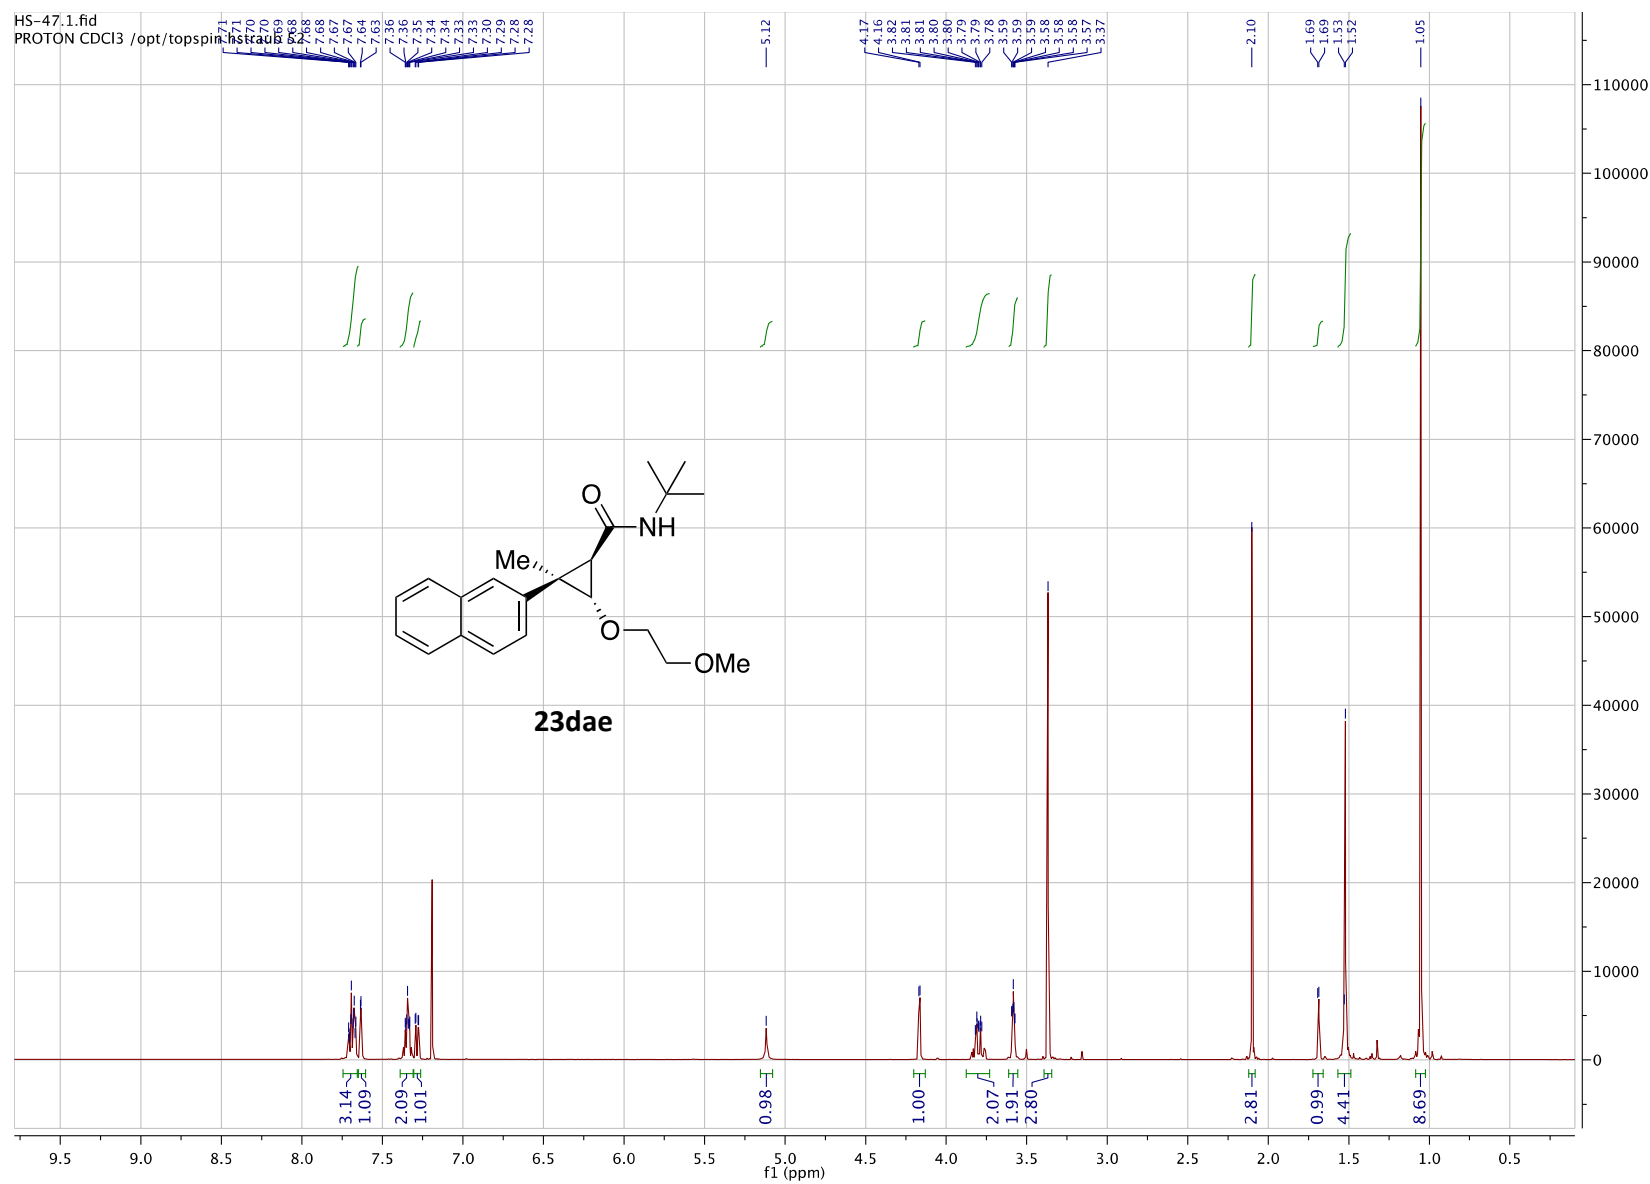

**Figure S23.**  $^1\text{H}$  NMR spectrum of compound **23dae**



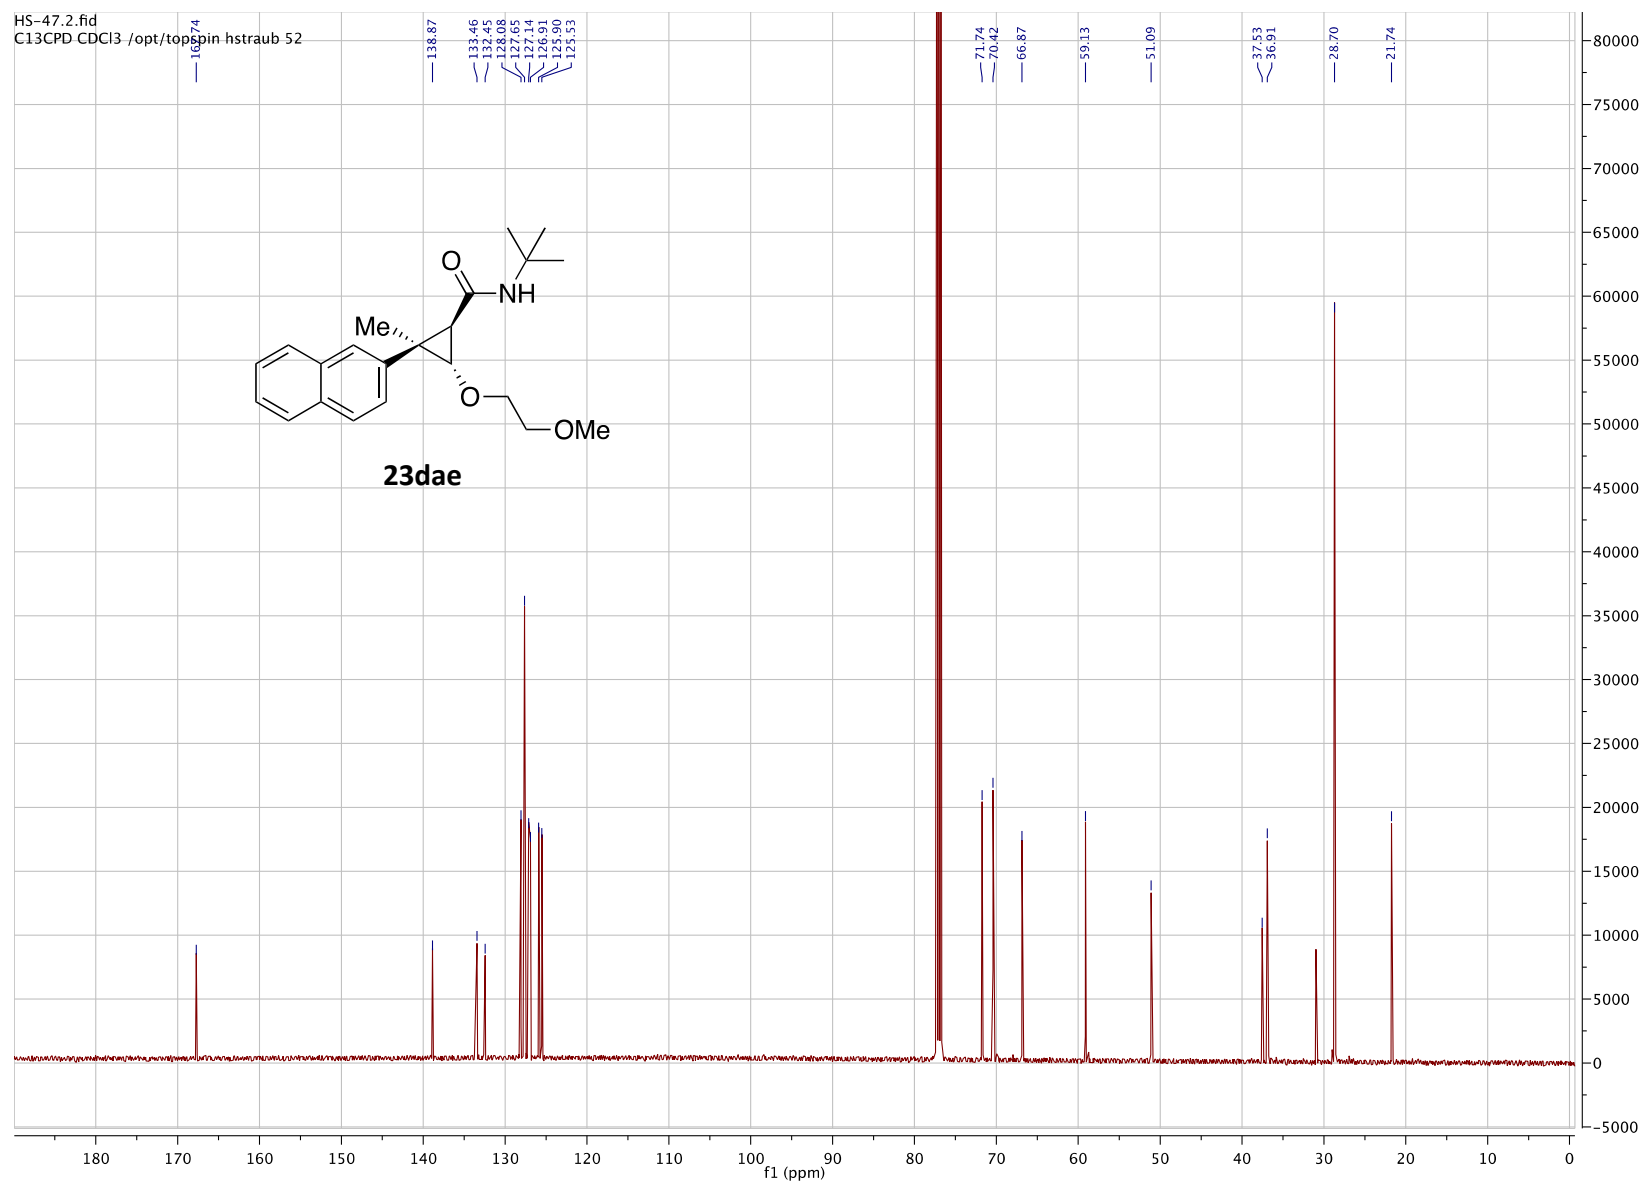

Figure S24.  $^{13}\text{C}$  NMR spectrum of compound **23dae**

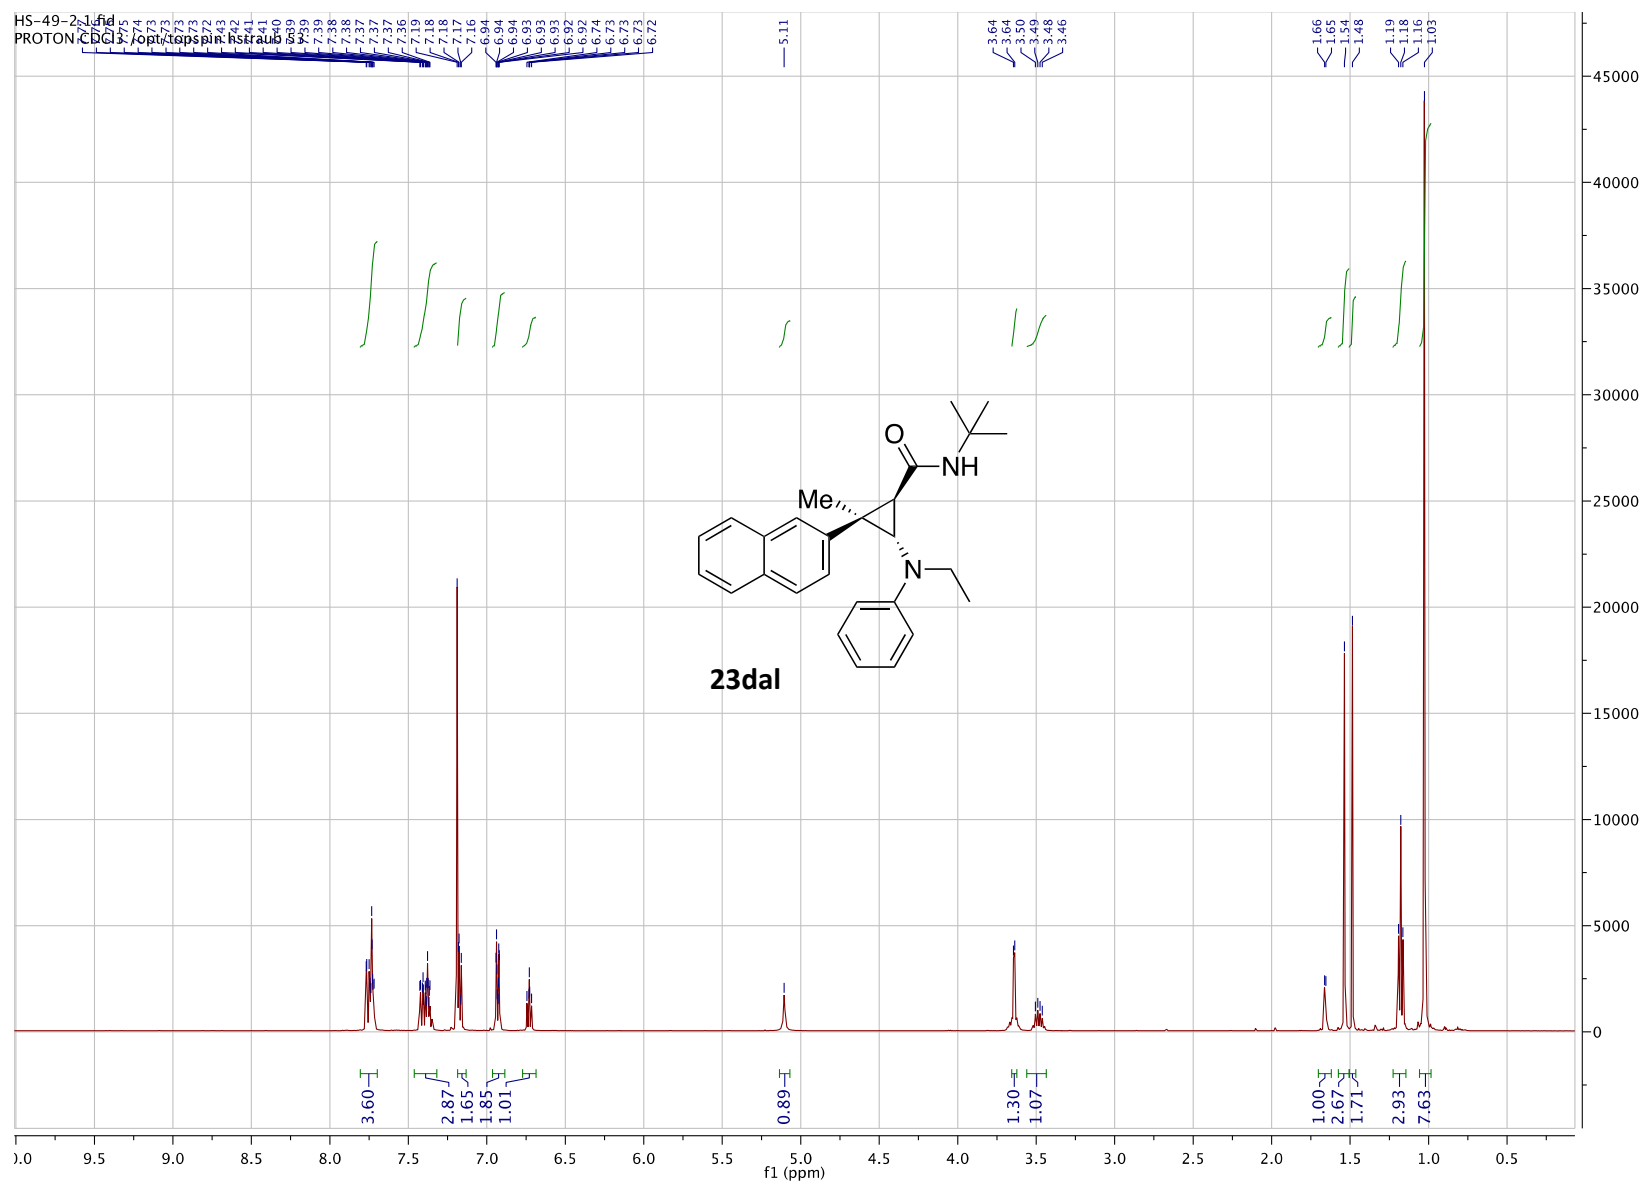

**Figure S25.** <sup>1</sup>H NMR spectrum of compound **23dal**

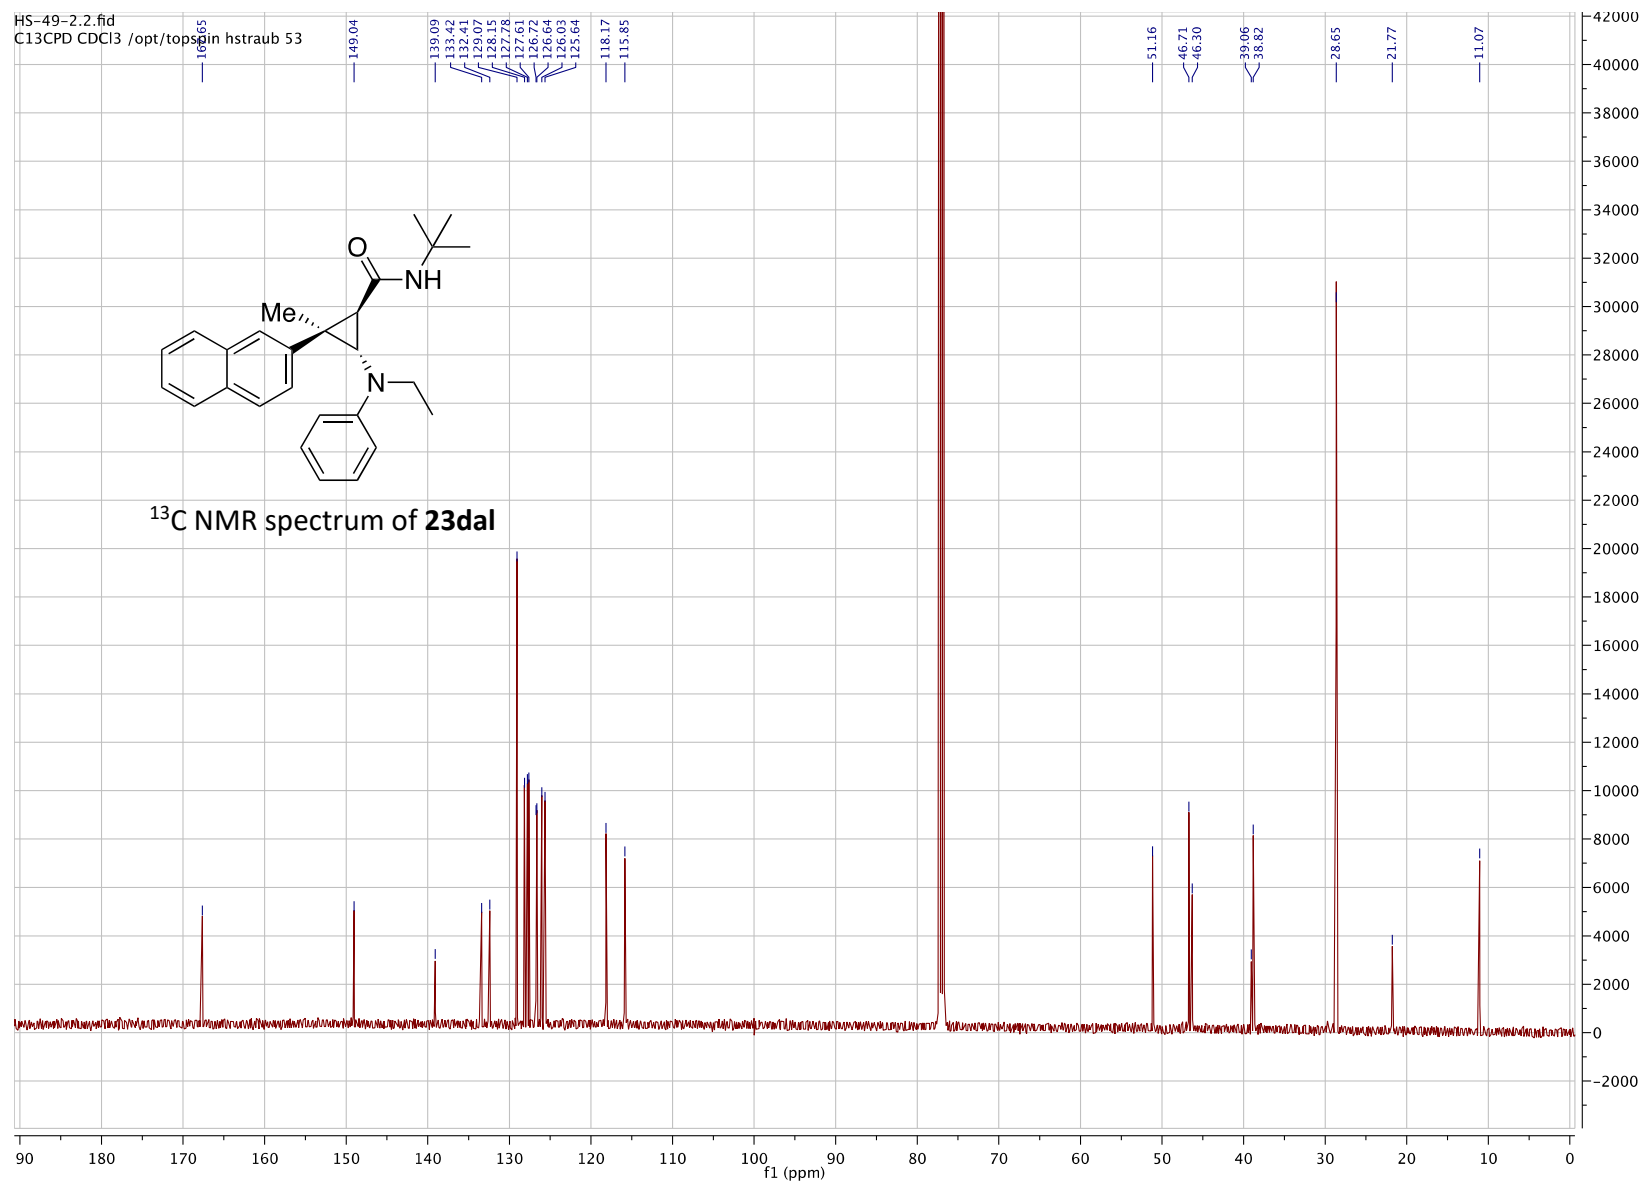

Figure S26. <sup>13</sup>C NMR spectrum of compound 23dal

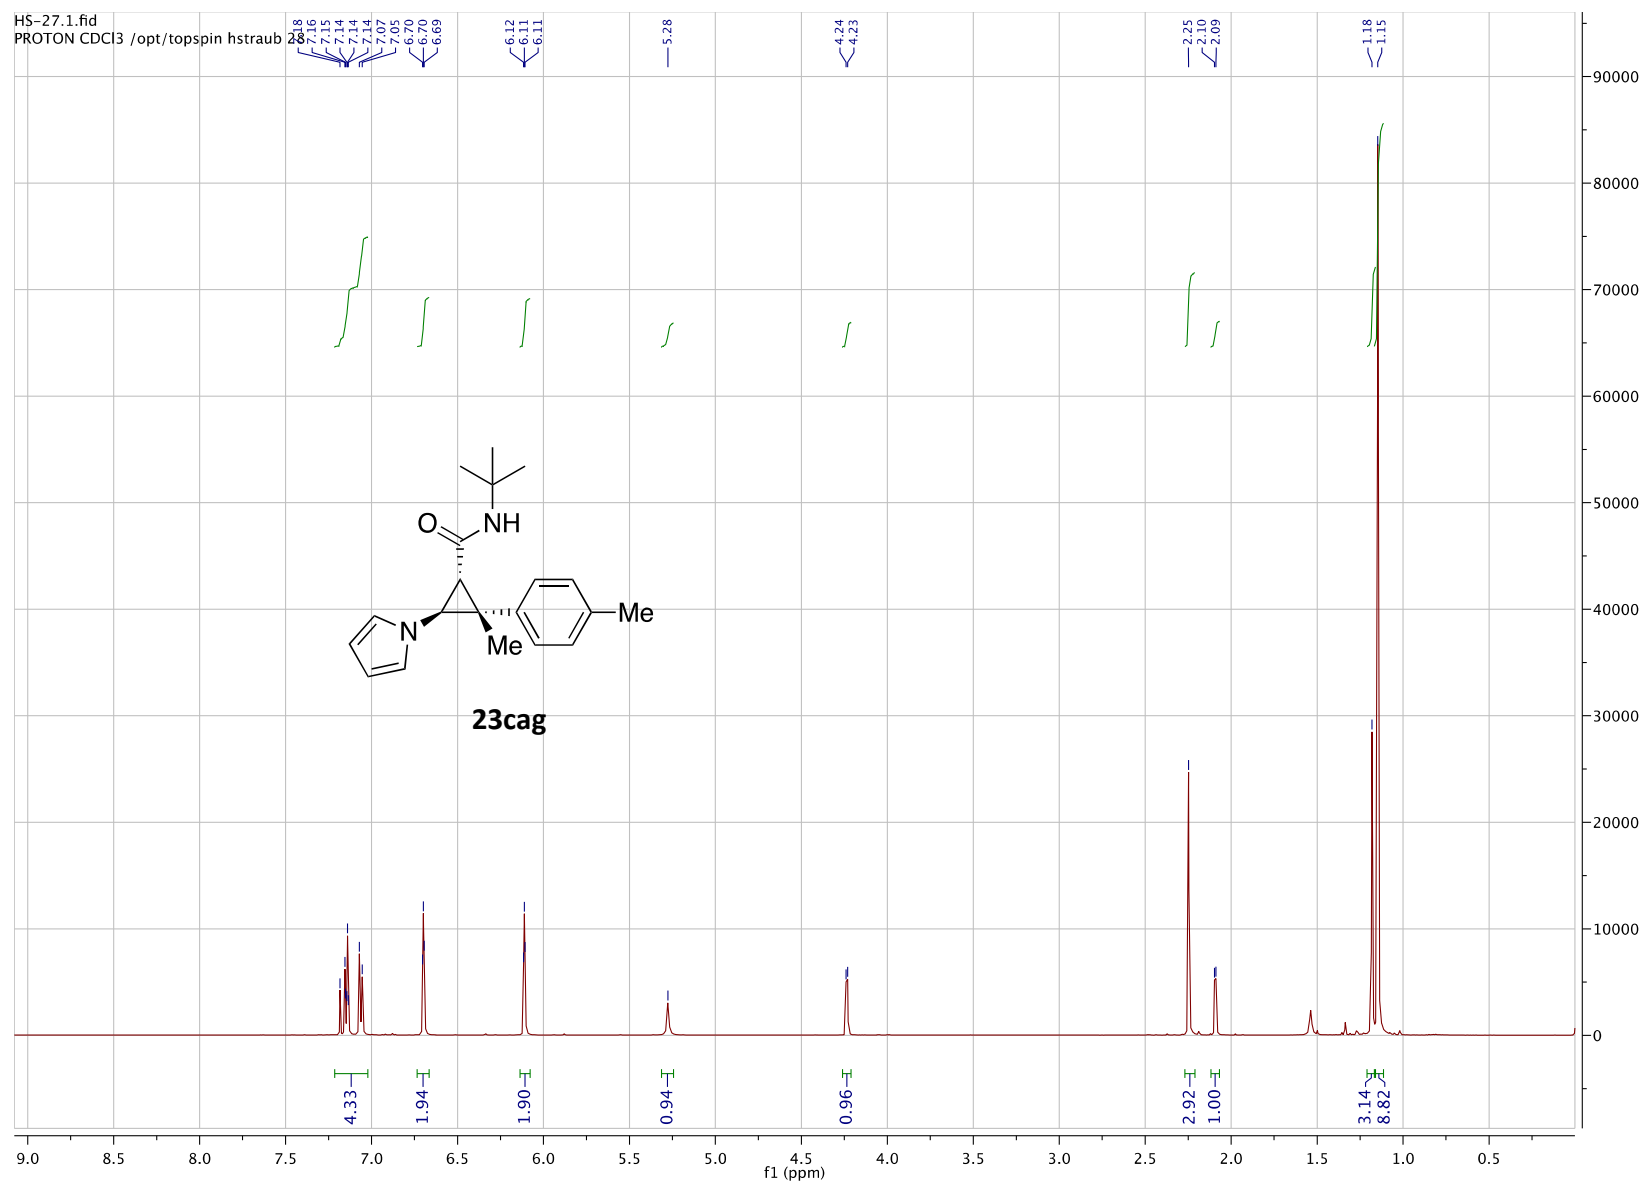

Figure S27.  $^1\text{H}$  NMR spectrum of compound **23cag**

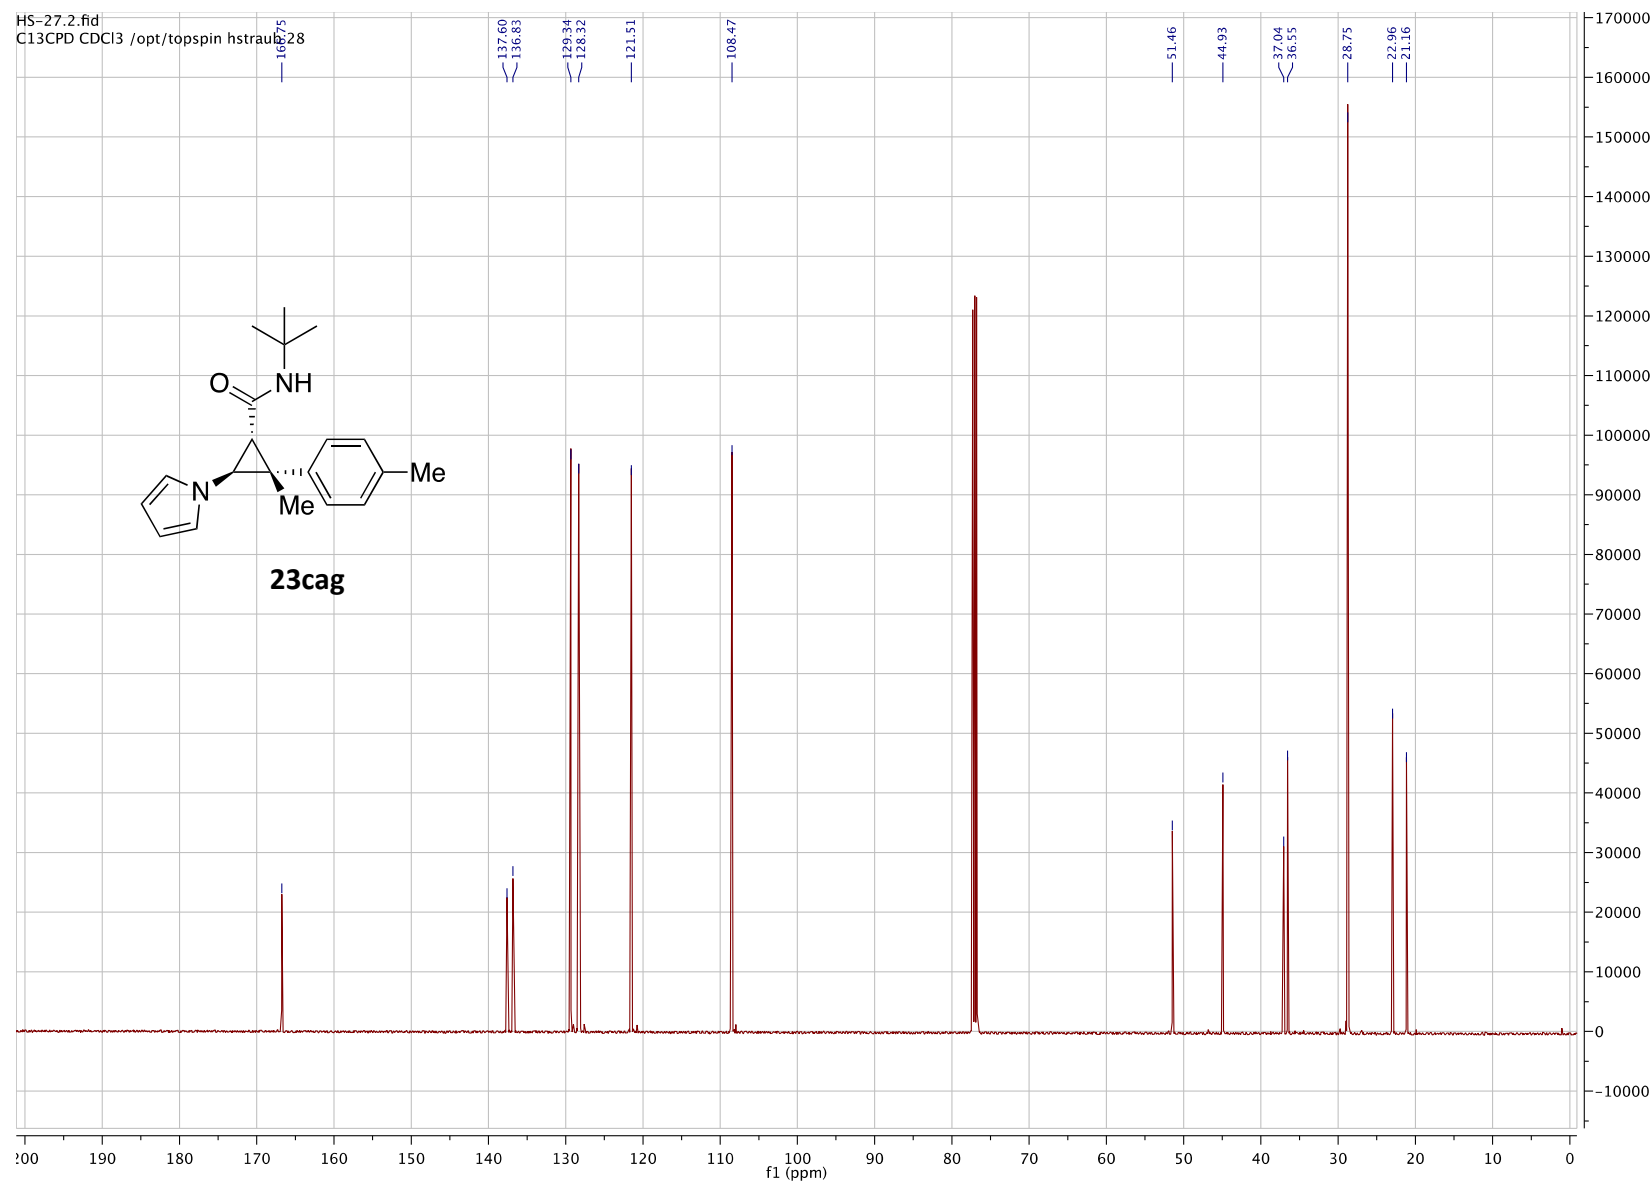

**Figure S28.**  $^{13}\text{C}$  NMR spectrum of compound **23cag**

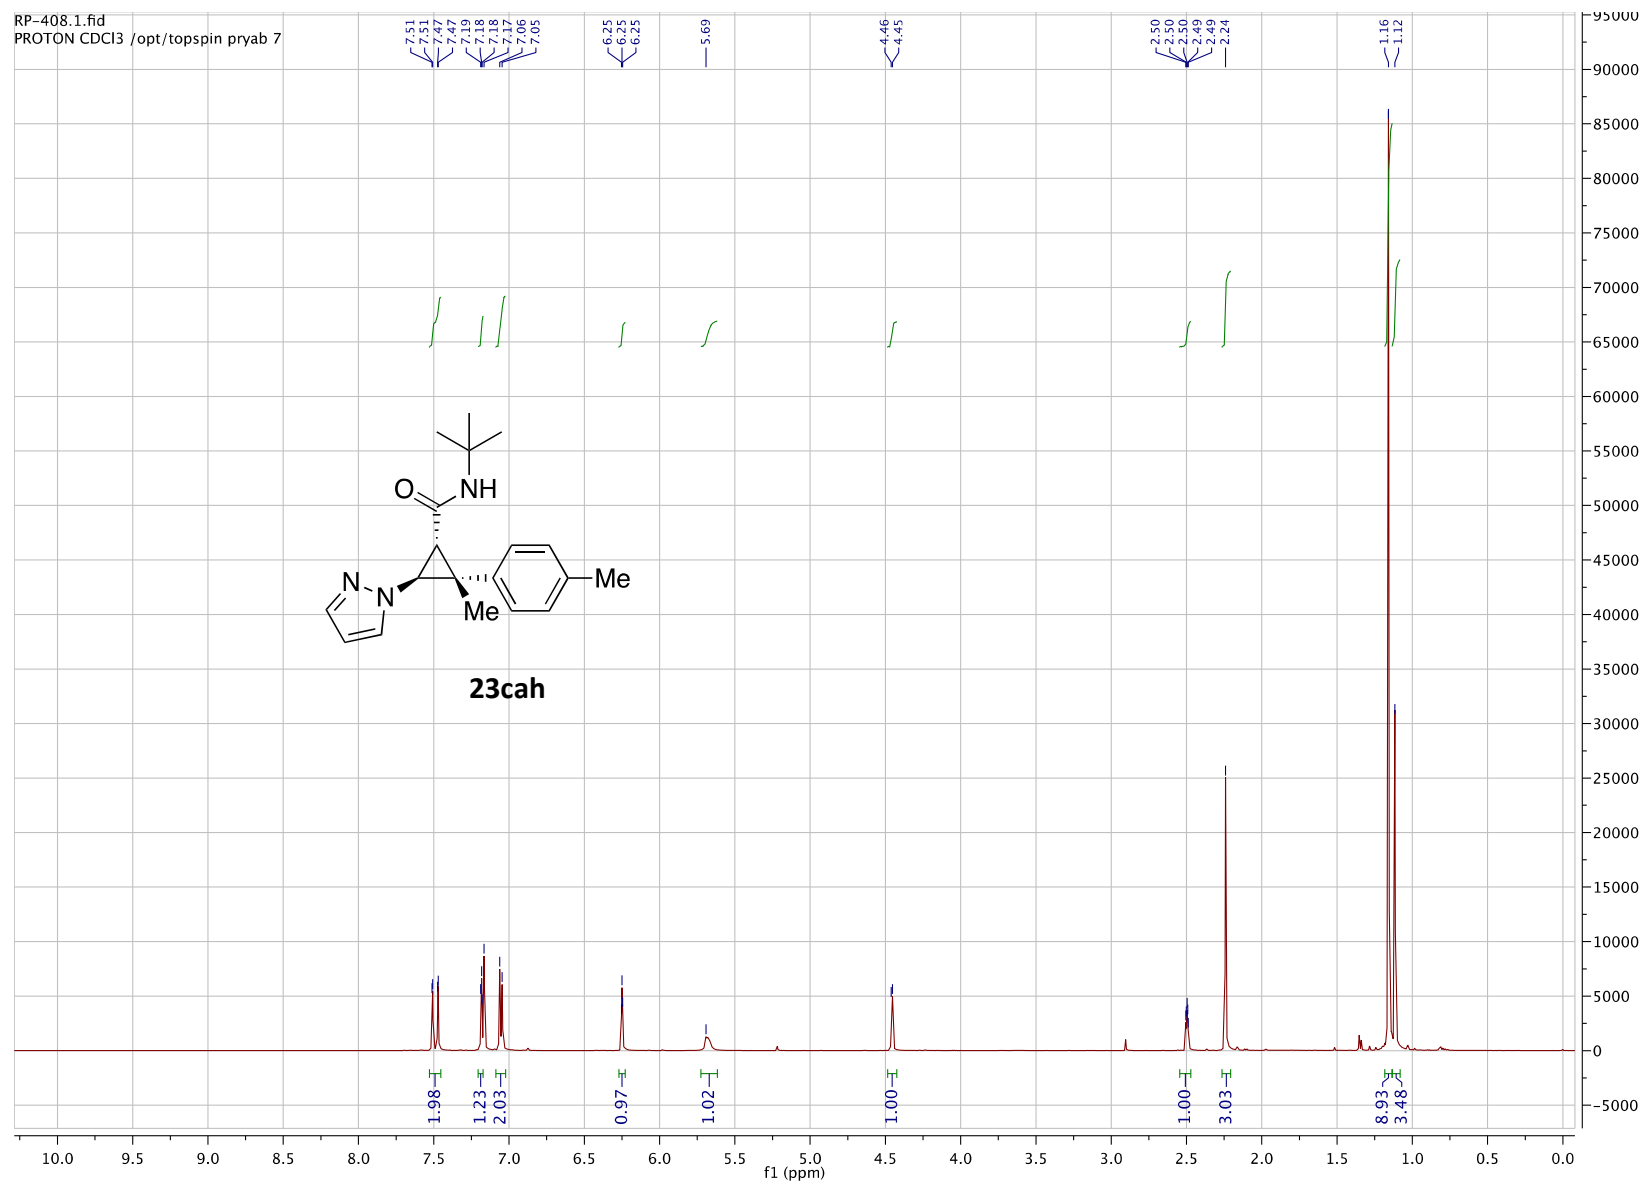

Figure S29.  $^1\text{H}$  NMR spectrum of compound **23cah**

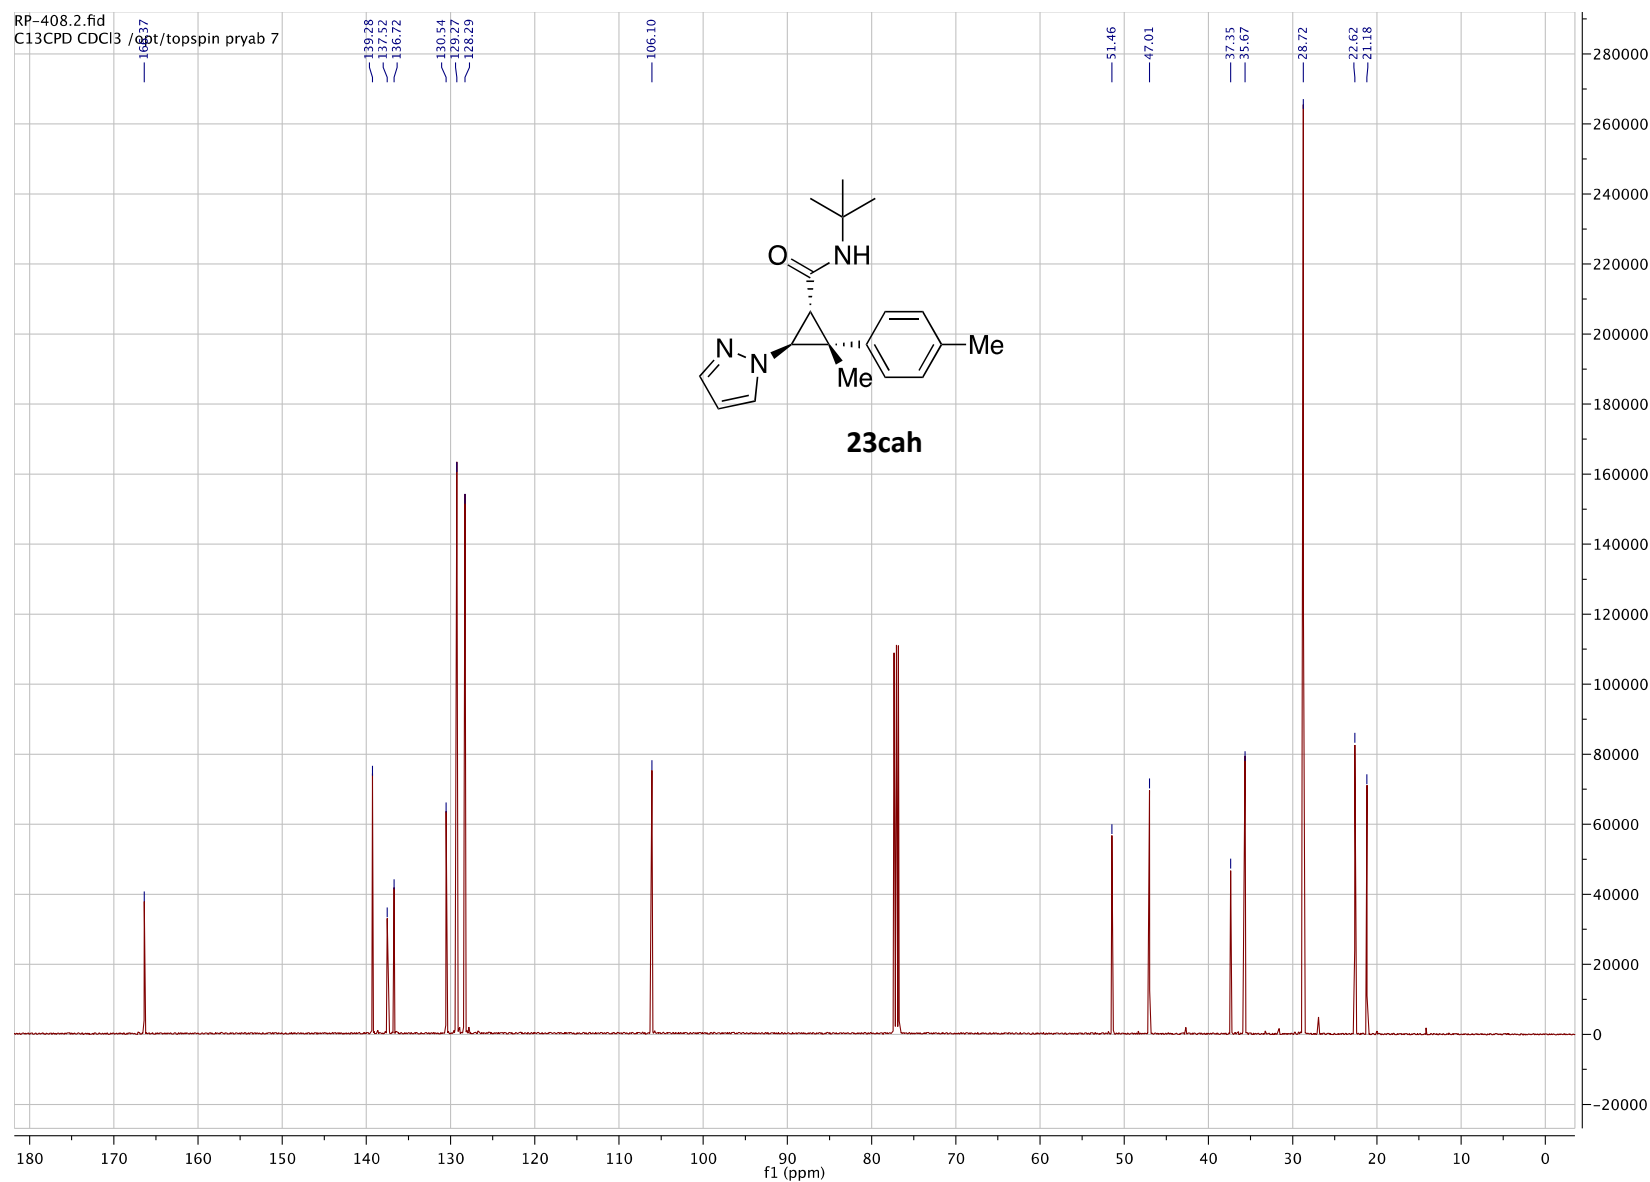

**Figure S30.**  $^{13}\text{C}$  NMR spectrum of compound **23cah**

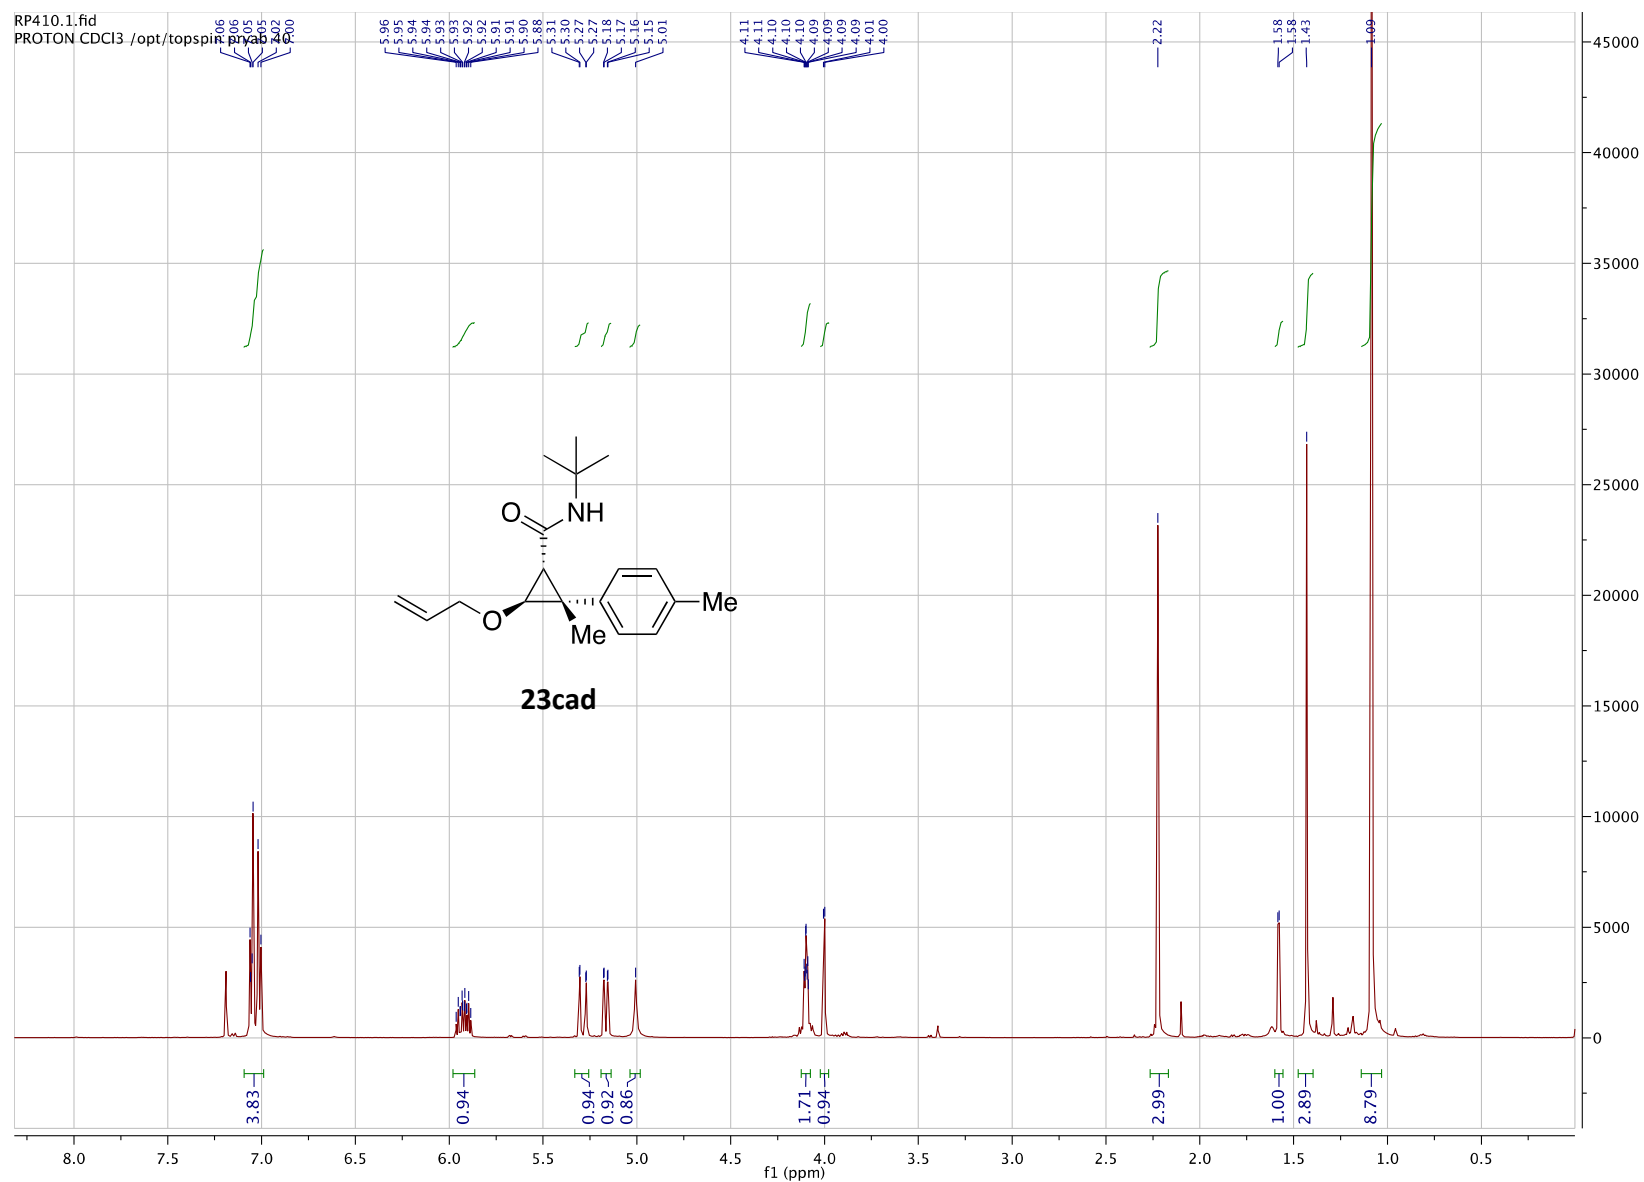

**Figure S31.**  $^1\text{H}$  NMR spectrum of compound **23cad**



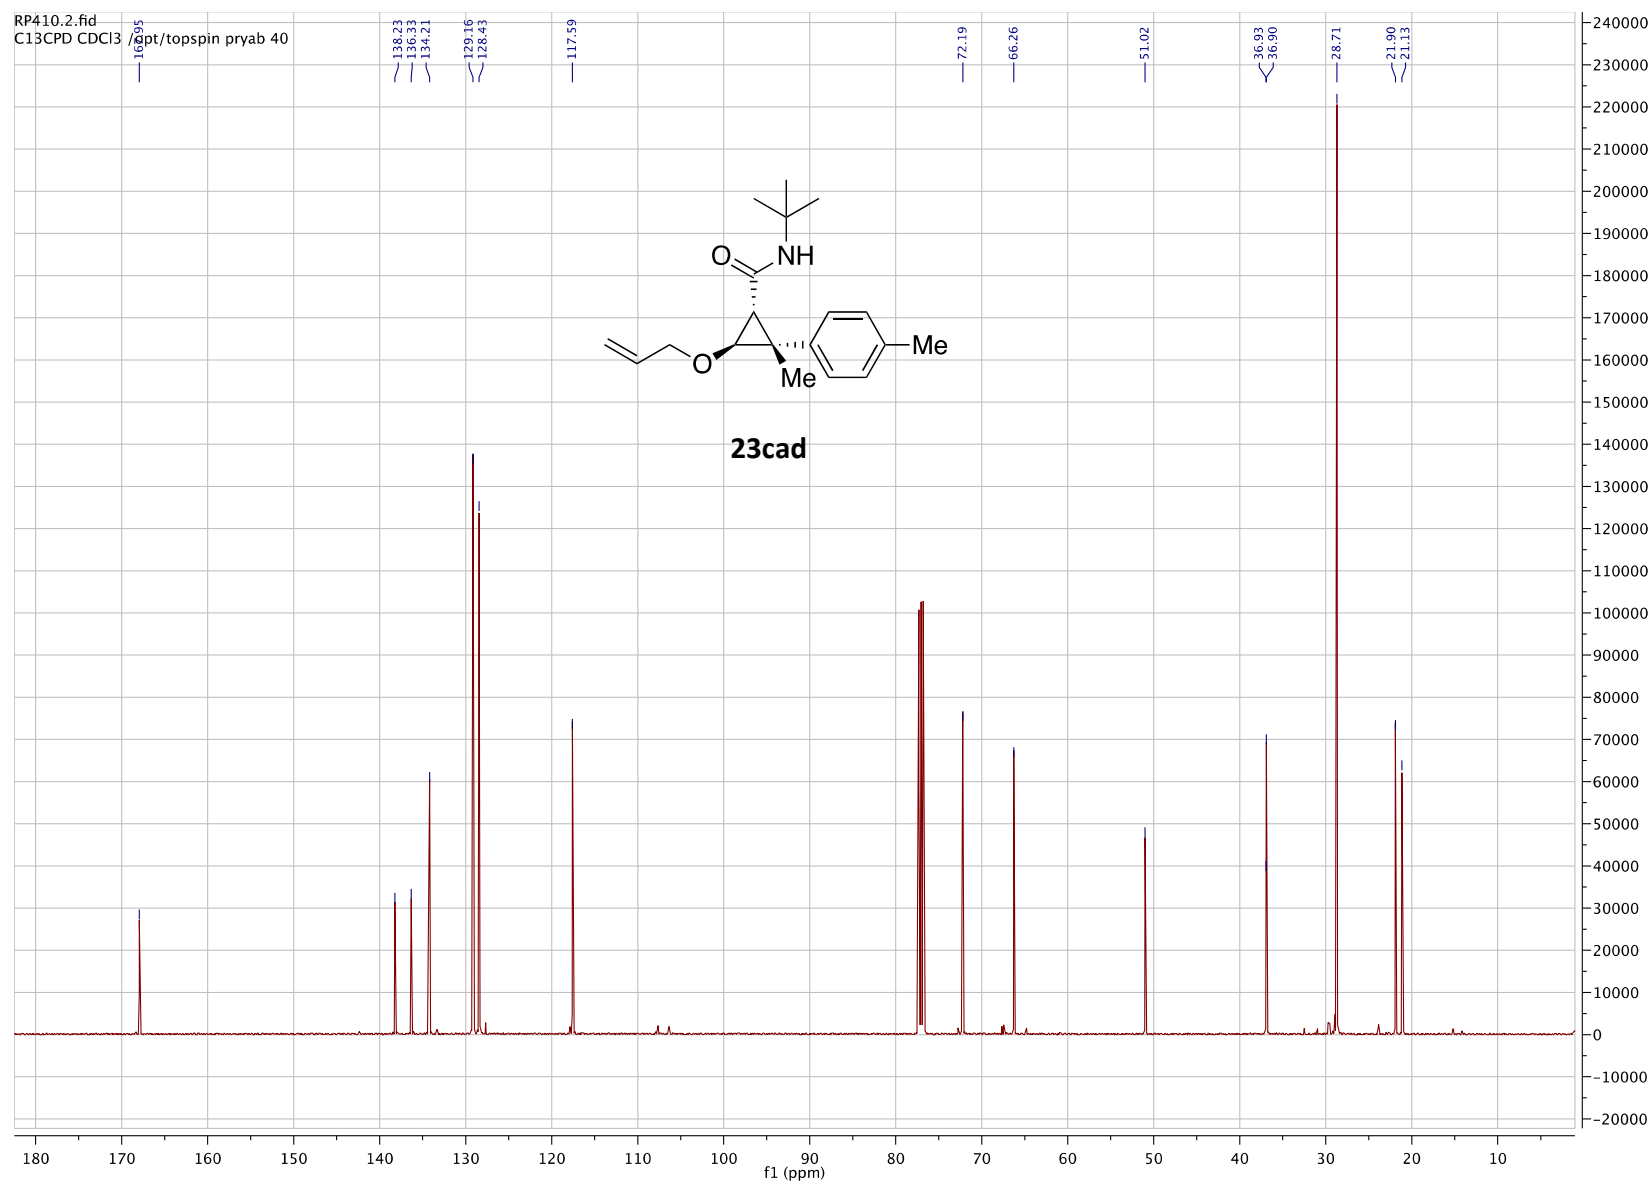

Supplement: s1 [file s1]
